# Supplementary material for: Guidelines on the intraoperative transfusion of red blood cells: a protocol for systematic review
Source: PubMed Central journal article supplement — BMJ Open. 2019 Jun 17;9(6):e029684. doi: 10.1136/bmjopen-2019-029684 (PMC6586075; doi:10.1136/bmjopen-2019-029684), 2019-06-17
Supplement: bmjopen-2019-029684.draft_revisions.pdf [file bmjopen-2019-029684.draft_revisions.pdf]

# BMJ Open

BMJ Open is committed to open peer review. As part of this commitment we make the peer review history of every article we publish publicly available.

When an article is published we post the peer reviewers' comments and the authors' responses online. We also post the versions of the paper that were used during peer review. These are the versions that the peer review comments apply to.

The versions of the paper that follow are the versions that were submitted during the peer review process. They are not the versions of record or the final published versions. They should not be cited or distributed as the published version of this manuscript.

BMJ Open is an open access journal and the full, final, typeset and author-corrected version of record of the manuscript is available on our site with no access controls, subscription charges or pay-per-view fees (<http://bmjopen.bmj.com>).

If you have any questions on BMJ Open's open peer review process please email [info.bmjopen@bmj.com](mailto:info.bmjopen@bmj.com)

# BMJ Open

## Guidelines on the intraoperative transfusion of red blood cells: a protocol for systematic review

|                               |                                                                                                                                                                                                                                                                                                                                                                                                                                                                                                                                                                                                                                                                                                                                                                                                                                                                   |
|-------------------------------|-------------------------------------------------------------------------------------------------------------------------------------------------------------------------------------------------------------------------------------------------------------------------------------------------------------------------------------------------------------------------------------------------------------------------------------------------------------------------------------------------------------------------------------------------------------------------------------------------------------------------------------------------------------------------------------------------------------------------------------------------------------------------------------------------------------------------------------------------------------------|
| Journal:                      | <i>BMJ Open</i>                                                                                                                                                                                                                                                                                                                                                                                                                                                                                                                                                                                                                                                                                                                                                                                                                                                   |
| Manuscript ID                 | bmjopen-2019-029684                                                                                                                                                                                                                                                                                                                                                                                                                                                                                                                                                                                                                                                                                                                                                                                                                                               |
| Article Type:                 | Protocol                                                                                                                                                                                                                                                                                                                                                                                                                                                                                                                                                                                                                                                                                                                                                                                                                                                          |
| Date Submitted by the Author: | 07-Feb-2019                                                                                                                                                                                                                                                                                                                                                                                                                                                                                                                                                                                                                                                                                                                                                                                                                                                       |
| Complete List of Authors:     | Baker, Laura; The Ottawa Hospital, General Surgery<br>Park, Lily; The Ottawa Hospital, General Surgery<br>Gilbert, Richard; The Ottawa Hospital, General Surgery<br>Martel, Andre; The Ottawa Hospital, General Surgery<br>Ahn, Hilalion; The Ottawa Hospital, General Surgery<br>Davis, Alexandra; Ottawa Hospital Research Institute<br>McIsaac, Daniel; The Ottawa Hospital, Anesthesiology and Pain Medicine<br>Saidenberg, Elianna; Ottawa Hospital, Pathology and Lab Medicine; The Ottawa Hospital<br>Tinmouth, Alan ; The Ottawa Hospital, Division of Hematology, Department of Medicine; Ottawa Hospital Research Institute, Medicine<br>Fergusson, Dean; Ottawa Hospital Research Institute, Medicine<br>Martel, Guillaume; Ottawa Hospital, Liver and Pancreas Unit, Department of Surgery; Ottawa Hospital Research Institute, Clinical Epidemiology |
| Keywords:                     | Protocols & guidelines < HEALTH SERVICES ADMINISTRATION & MANAGEMENT, SURGERY, Blood bank & transfusion medicine < HAEMATOLOGY, Adult anaesthesia < ANAESTHETICS, Paediatric anaesthesia < ANAESTHETICS                                                                                                                                                                                                                                                                                                                                                                                                                                                                                                                                                                                                                                                           |
|                               |                                                                                                                                                                                                                                                                                                                                                                                                                                                                                                                                                                                                                                                                                                                                                                                                                                                                   |

SCHOLARONE™  
Manuscripts

*Baker et al. Guidelines on the intraoperative transfusion of red blood cells: a protocol for systematic review*

**Guidelines on the intraoperative transfusion of red blood cells: a protocol for systematic review**

Laura Baker<sup>1,2,3,4</sup>, Lily Park<sup>4</sup>, Richard Gilbert<sup>1,4</sup>, Andre Martel<sup>1,4</sup>, Hilalion Ahn<sup>4</sup>, Alexandra Davies<sup>5</sup>, Daniel McIsaac<sup>2,3,6</sup>, Elianna Saidenberg<sup>2,7</sup>, Alan Tinmouth<sup>2,3,7</sup>, Dean Fergusson<sup>2,3</sup>, Guillaume Martel<sup>1,2,3</sup>

Liver and Pancreas Unit, Department of Surgery, The Ottawa Hospital<sup>1</sup>

Ottawa Hospital Research Institute<sup>2</sup>

School of Epidemiology and Public Health, Faculty of Medicine, The University of Ottawa<sup>3</sup>

Faculty of Medicine, The University of Ottawa<sup>4</sup>

Learning Services, The Ottawa Hospital<sup>5</sup>

Departments of Anesthesiology & Pain Medicine, University of Ottawa and The Ottawa Hospital<sup>6</sup>

Division of Hematology, Department of Medicine, The Ottawa Hospital<sup>7</sup>

**Corresponding author:**

Guillaume Martel, MD, MSc, FRCSC, FACS

501 Smyth Road, CCW 1667

Ottawa, ON K1H 8L6

gumartel@toh.ca

Tel.: +1-613-737-8899, ext. 71053

**Additional authors:**

Laura Baker laurbaker@toh.ca

Lily Park lpark016@uottawa.ca

Richard Gilbert rigilbert@toh.ca

Andre Martel anmartel@toh.ca

Hilalion San hahn066@uottawa.ca

*Baker et al. Guidelines on the intraoperative transfusion of red blood cells: a protocol for systematic review*

28  
29 Daniel McIsaac [dmcisaac@toh.ca](mailto:dmcisaac@toh.ca)  
30  
31 Elianna Saidenberg [esaidenberg@toh.ca](mailto:esaidenberg@toh.ca)  
32 Alan Tinmouth [atinmouth@toh.ca](mailto:atinmouth@toh.ca)  
33 Dean Fergusson [dafergusson@ohri.ca](mailto:dafergusson@ohri.ca)

## **ABSTRACT**

**Introduction** A significant proportion of red blood cell transfusions are administered intraoperatively; yet there is limited evidence to guide transfusion decisions in this setting. The objective of this systematic review is to explore the availability, quality and content of clinical practice guidelines (CPG) reporting on the indication for allogenic RBC transfusion in the intraoperative setting.

**Methods** Major electronic databases (MEDLINE, EMBASE and CINAHL), guideline clearinghouses and Google Scholar, will be systematically searched from inception to January 2019 for CPGs pertaining to indications for intraoperative allogenic RBC transfusion. Characteristics of eligible guidelines will be reported in a summary table. The AGREE II instrument will be used to appraise the quality of identified guidelines. Recommendations advising on indications for intraoperative RBC transfusion will be manually extracted and presented to allow for comparison of similarities and/or discrepancies in the literature. .

**Ethics and dissemination** The results of this systematic review will be disseminated through relevant conferences and peer-reviewed journals.

**Protocol registration number** PROSPERO CRD42018111487

### **Strengths and limitations of this study:**

- The proposed study is the first systematic review to identify the availability of practice guidelines advising on intraoperative red blood cell transfusion
- A multidisciplinary group of methodologic and content experts are involved in this review
- The search strategy will be PRESS reviewed
- Guidelines in all languages will be considered for inclusion

*Baker et al. Guidelines on the intraoperative transfusion of red blood cells: a protocol for systematic review*

- 1  
2  
3 57 • The Appraisal of Guidelines for Research and Evaluation II (AGREE II) instrument, an  
4  
5 58 internationally validated tool, will be utilized to assess the quality of guidelines by four  
6  
7 59 independent reviewers  
8  
9  
10 60

11 **INTRODUCTION**  
12

13 62 Red blood cell (RBC) transfusions although potentially lifesaving, are a costly and limited  
14  
15 63 resource, associated with possible harm. Potential adverse outcomes range in severity, from minor  
16  
17 64 to life-threatening. Relatively mild reactions include febrile non-hemolytic transfusion reactions,  
18  
19 65 minor allergic reactions, or development of RBC alloantibodies. RBC alloantibodies can usually be  
20  
21 66 managed with the provision of antigen negative products (1)(2). However, in the case of rare  
22  
23 67 antibodies, development of alloantibodies can complicate administration of future blood products  
24  
25 68 (1). Life-threatening transfusion reactions include anaphylaxis, transfusion related acute lung injury,  
26  
27 69 bacterial contamination of blood products resulting in sepsis, acute hemolytic transfusion reactions,  
28  
29 70 and transfusion associated circulatory overload (1)(2). While the risk of transfusion transmitted viral  
30  
31 71 infections has dropped drastically in recent years and the risk of this occurring is extremely low, it  
32  
33 72 remains a concern when deciding to transfuse patients (2). RBC transfusions may also cause  
34  
35 73 immunosuppression in the recipient, a process called “transfusion-related immunomodulation  
36  
37 74 (TRIM) (3). TRIM provides rationale for the negative association observed between RBC transfusion  
38  
39 75 and post-operative adverse events as well as cancer recurrence in patients undergoing oncology  
40  
41 76 surgery (4) (5) (6) (7) (8) (9) (10). At an estimated price tag of \$US761 per unit, RBC transfusions  
42  
43 77 are costly (11) (12). They are also in short supply, relying on altruistic blood donors to ensure  
44  
45 78 inventory stability (13) (14). Given their associated risk, expense and scarcity, it is critical they are  
46  
47 79 administered wisely.  
48  
49  
50

51 80 There has been significant evolution in our understanding of humans’ ability to tolerate  
52  
53 81 anemia; resulting in a shift in approach to RBC transfusion prescribing practices from the “10/30”  
54  
55 82 rule (i.e. transfusion indicated below a hemoglobin of 10g/L or hematocrit <30%) to the widely  
56  
57 83 accepted transfusion trigger of 70g/L in the asymptomatic patient without significant cardiac  
58  
59  
60

*Baker et al. Guidelines on the intraoperative transfusion of red blood cells: a protocol for systematic review*

84 comorbidity. This change came into effect following reporting of the TRICC trial and others that have  
85 shown the safety of a restrictive transfusion threshold (15, 16) (17) (18). Importantly, the findings of  
86 these studies, which have impacted transfusion practices across a broad spectrum of clinical  
87 scenarios, are not necessarily applicable in the operative setting.

88 The operative setting presents a unique situation in which the indications for transfusion  
89 commonly reported in the non-operative patient have limited transferability. As blood loss, and  
90 consequently hemoglobin concentration can be unpredictable during surgery, hemoglobin  
91 concentrations may drop suddenly, making previous measurements of hemoglobin concentration  
92 invalid. This limits the feasibility of utilizing specific hemoglobin levels to guide RBC transfusion  
93 administration in surgical patients (19). There is some literature to suggest estimated surgical blood  
94 loss can be utilized to guide transfusion decisions (20) (21). However, there is good evidence to  
95 support the inability of clinicians to accurately predict blood loss (22). It is also important to  
96 appreciate that not all intraoperative bleeding is the same, varying from a persistent, slow ooze, to  
97 massive, rapid blood loss from a major vessel. Additionally, reliance on hemodynamics is complex  
98 as in addition to blood loss, it is a reflection of multiple variables, including but not limited to:  
99 anesthetic agents, patient positioning, presence of pneumoperitoneum and neurologic stimulation  
100 (23). In the non-operative setting, acute blood loss of approximately 20% results in a compensatory  
101 tachycardia (24). However, because of the other variables at play in the anesthetized patient,  
102 tachycardia is not a reliable marker of blood loss. Another common recommendation is to monitor  
103 for the presence of inadequate perfusion and oxygenation of vital organs (21). The ability to monitor  
104 for symptoms of decreased end-organ perfusion such as decreased level of consciousness, chest  
105 pain, or abdominal pain, are not possible in the unconscious patient under general anesthesia.  
106 Incorporation of decision rules specific to surgical patient, such as monitoring for ST changes, are  
107 fundamental to guiding appropriate RBC transfusion for a patient under general anesthesia for  
108 surgery(25).

109 The uncertainty of transfusion indications in this patient population is demonstrated by the  
110 abundance of literature reporting on the wide variability in transfusion practices but largely reporting

*Baker et al. Guidelines on the intraoperative transfusion of red blood cells: a protocol for systematic review*

111 over-transfusion of surgical patients (26) (27) (28) (29) (30). A recent survey of Canadian liver  
112 surgeons and anesthesiologists highlights the lack of consensus between practitioners regarding  
113 indications for transfusion. In response to the question “what is the most important information you  
114 use to decide on intraoperative transfusion,” the majority of anesthesiologist selected hemoglobin  
115 value (47.2% vs 19% of surgeons;  $p < 0.05$ ), whereas surgeons selected hemodynamics (33.4% vs  
116 14% of anesthesiologist;  $p > 0.05$ ) (31). A prospective observational study of intraoperative  
117 transfusion practices in Europe reported “physiologic trigger irrespective of hemoglobin” as the most  
118 common indication for transfusion in a cohort of 5803 patients (32). Despite a global shift to a more  
119 restrictive transfusion strategy, wide variability in practice patterns in the intraoperative setting exists,  
120 and therefore warrants a review of the recommendations.

121 A preliminary search reveals guidance pertaining to RBC transfusion in the intraoperative  
122 patient population is lacking. Recently published guidelines from AABB, a worldwide leader in  
123 producing clinical practice guidelines for utilization of blood components, neglected to provide  
124 recommendations on indications for RBC transfusion in the intraoperative setting likely due to a lack  
125 of evidence on which to base recommendations (33). Guidelines endorsed by surgical and  
126 anesthesia societies offer vague recommendations with limited directives for when to transfuse, for  
127 example, to monitor for blood loss, check hemoglobin or hematocrit prior to transfusion, adopt a  
128 restrictive transfusion strategy or assess for adequate perfusion and oxygenation (34) (35) (36) (37)  
129 (38). As eluded to previously, reliance on these variables is limited in the intraoperative period. A  
130 formal review of the literature to understand available guidance for intraoperative RBC decisions is  
131 necessary.

132 In summary, blood transfusions are associated with possible harm and over-transfusion in  
133 the intraoperative setting is common. Although there is an abundance of guidance pertaining to  
134 indications for RBC transfusion, a review of guidance dedicated to the intraoperative patient does  
135 not currently exist.

136

137 **OBJECTIVE**

*Baker et al. Guidelines on the intraoperative transfusion of red blood cells: a protocol for systematic review*

138 The objective of this systematic review is to explore the availability, quality and consistency  
139 of published guidelines reporting on the indication for allogenic red blood cell transfusion in the  
140 intraoperative setting. We also aim to summarize the existing recommendations and associated  
141 level of evidence.

142

143 **METHODS**

144 The Preferred Reporting Items for Systematic Review and Meta-analysis Protocols  
145 (PRISMA-P) checklist guidelines were referenced for development of this protocol (39) (40). A  
146 PRISMA-P checklist is available as a supplementary document. The protocol was registered with  
147 the PROSPERO International Prospective Register of Systematic Reviews on October 16, 2018  
148 (CRD42018111487).

149 Any amendments made to the current protocol will be published using a protocol addendum,  
150 accompanied by the date of and rationale for the reported amendment, with the final manuscript.

151 ***Eligibility criteria:***

152 Guidelines reporting on indications for allogenic red blood cell transfusion in the  
153 intraoperative setting will be considered for inclusion. Our definition of clinical practice guidelines is  
154 adopted from the Institute of Medicine and National Guideline Clearinghouse which define them as  
155 recommendations, derived from systematic review of evidence, from collective opinions of an expert  
156 panel, aimed at health care providers intended to improve patient care (41, 42). An article will be  
157 included if it: (1) is presented as a clinical practice guideline; (2) is based on a systematic review of  
158 evidence; (3) is produced by a medical association, professional society, public or private  
159 organization or government agency and not by an individual(s) not sponsored or supported by the  
160 above groups; (4) includes recommendations for indications for allogenic red blood cell transfusion  
161 in the intraoperative setting; (5) in any language; (6) full-text available.

162 We plan on excluding: (1) documents that do not meet the definition of a guideline as stated  
163 above; (2) guidelines pertaining to the perioperative period that do not make specific



*Baker et al. Guidelines on the intraoperative transfusion of red blood cells: a protocol for systematic review*

164 recommendations on the intraoperative setting (3) previous documents replaced by updated  
165 versions from the same organization.

**166 Information sources and search strategy**

167 MEDLINE (OVID interface, including In-Process and Epub Ahead of Print) and EMBASE  
168 (OVID interface) and CINHAL will be systematically searched from inception to January 2019,  
169 through application of a search strategy developed by a health science librarian with expertise in  
170 systematic reviews. Search terms will include 'allogenic red blood cell transfusion', 'guideline' and  
171 'operative'. The search will not be restricted by date, language or patient population (ie. adult versus  
172 pediatric). A Peer Review of Electronic Search Strategies (PRESS) will be performed by a second  
173 information specialist who is not associated with the project. A draft search strategy for Medline  
174 can be found in Appendix 1. The following guideline-specific databases will also be searched:  
175 National Institute for Health and Care Excellence (NICE) (UK), the Canadian Medical Association  
176 Infobase (Canada), the G-I-N International Guideline Library, the New Zealand Guidelines (NZG)  
177 Group, The World Health Organization and the Scottish Intercollegiate Guidelines Network (SIGN)  
178 (43-48). Google Scholar will be searched with '(intraoperative OR perioperative) AND (guideline  
179 OR consensus OR recommendation OR statement)' and the first 200 records will be screened.  
180 References of identified articles will be reviewed for relevant guidelines.

**181 Study Records**

182 Articles identified through the electronic databases (MEDLINE and EMBASE) will be  
183 imported into Covidence, an online citation manager (49). All titles and abstracts identified will be  
184 independently screened by two reviewers for relevance and categorized as relevant, possibly  
185 relevant, or irrelevant. Articles categorized as relevant or possibly relevant will be retrieved for further  
186 evaluation. Full texts will also reviewed in duplicate for eligibility. Google translate will be used to  
187 translate non-English, non-French articles, with the exception of those written in Chinese (50). Any  
188 disagreement regarding relevancy will be resolved by a senior author. Reason for study exclusion  
189 will be documented and presented in the PRISMA flow diagram for study screening (Figure 1).

190 Guidelines identified from the guideline repositories will be recorded in an Excel spread sheet.

*Baker et al. Guidelines on the intraoperative transfusion of red blood cells: a protocol for systematic review*

191 **Data Items**

192 Data pertaining to the publication details (authors, year of publication, journal, etc),  
193 population(s) in which the intraoperative transfusion guidelines pertain to (type of surgery), patient  
194 variables taken into consideration in determining appropriateness for transfusion (example:  
195 hemodynamics, blood loss, evidence of cardiac ischemia, etc.), and grading of recommendation if  
196 assigned will be extracted. Data extraction forms (DEF) will be developed and piloted  
197 independently by two reviewers on a set of 5 randomly selected guidelines. Modifications will be  
198 made to the DEF as necessary. Data will be extracted independently by two reviewers, in duplicate.

199 **Outcomes & Prioritization**

200 The objectives are to (1) characterize the clinical practice guidelines advising on  
201 intraoperative RBC utilization (2) appraise their quality and (3) provide a descriptive summary of the  
202 included guidelines.

203 **Characterization of identified guidelines**

204 A descriptive table of identified guidelines will be presented. This table will include  
205 information publication information as well as the target patient population of the guideline.

206 **Guideline quality assessment: AGREE II**

207 The Appraisal of Guidelines for Research and Evaluation II (AGREE II) instrument will be  
208 used to assess the quality of included guidelines (51). The AGREE II instrument is a validated  
209 questionnaire aimed at assessing the methodologic quality of clinical practice guidelines and has  
210 been widely adopted in the scientific literature (51) (52) (53). It is comprised of 23 questions scored  
211 on a seven-point Likert scale (whereby 7 indicates the highest quality), covering 6 domains, inclusive  
212 of scope and purpose of the guidelines, stakeholder involvement, rigour of development, clarity of  
213 presentation and editorial independent. There are two additional questions. The first assesses the  
214 overall quality of the guideline, rated on a seven-point Likert scale. The final question asks the  
215 evaluator whether they would recommend using this guideline, to which the assessor responds  
216 "yes," "yes, with modifications," or "no."

*Baker et al. Guidelines on the intraoperative transfusion of red blood cells: a protocol for systematic review*

1  
2  
3 217 It is recommended that four assessors complete the AGREE II to achieve an intra-class  
4  
5 218 correlation coefficient  $\geq 0.7$ . Four appraisers will therefore be selected to complete the online training  
6  
7 219 and independently evaluate the included guidelines. Once complete, the evaluators will meet and  
8  
9 220 discuss any scores differing by more than 1 point. At that point, evaluators can amend or keep their  
10  
11 221 original score. Inter-rater reliability will be calculated using the intraclass correlation coefficient (ICC)  
12  
13 222 using SAS.

14  
15 223 Domain scores will be reported separately using both the median and scaled domain scores,  
16  
17 224 as is recommended by the AGREE II consortium. The scaled domain score will be calculated as  
18  
19 225 follows: (obtained score-minimal possible score)/(maximal possible score-minimal possible  
20  
21 226 score)=\_\_%. The minimum possible score is calculated as: (number of questions) x (number of  
22  
23 227 reviewers) x 1. The maximum possible score is calculated as: (number of questions) x (number of  
24  
25 228 reviewers) x 7.

26  
27  
28 229 **Recommendation synthesis**

29  
30 230 A descriptive table of included studies will be presented displaying all recommendations  
31  
32 231 pertaining to indications for RBC transfusion in the intraoperative period. Recommendations will be  
33  
34 232 compared for consistency and/or repetition.

35  
36  
37 233 **Analysis of subgroups or subsets**

38  
39 234 Guidelines pertaining to indications for blood transfusion in cardiac versus non-cardiac  
40  
41 235 surgery patients will be grouped and considered separately .

42  
43 236 **Dissemination**

44  
45 237 The results of this review will be submitted for presentation at national and international  
46  
47 238 meetings and publication in a peer-reviewed journal.

48  
49 239 **Reporting of review**

50  
51 240 The findings of this systematic review will be reported according to the Preferred Reporting  
52  
53 241 Items for Systematic Reviews and Meta-analyses (PRISMA) statement. The completed checklist  
54  
55 242 will be provided as supplementary material.

56  
57  
58 243 **Confidence in cumulative evidence**

*Baker et al. Guidelines on the intraoperative transfusion of red blood cells: a protocol for systematic review*

244 The quality of recommendations will be evaluated by using the systematic and  
245 comprehensive approach known as Grading of Recommendations, Assessment, Development and  
246 Evaluations (GRADE) (54). The quality of evidence will be assessed across the domains of risk of  
247 bias, consistency, directness, precision and publication bias.

248 ***Patient and public involvement***

249 This investigation is aligned with research priorities established by The Canadian Blood  
250 Services (CBS), a not-for-profit charitable organization, responsible for managing the Canadian  
251 blood supply (with the exception of Quebec) (55). Specifically, they have identified: (1) promoting  
252 appropriate blood product utilization and (2) ensuring an adequate blood product supply, as two of  
253 five research priorities. CBS invites public participation in their bi-annual board meetings, where a  
254 number of issues are addressed, inclusive of priority research agendas. Patients or the public  
255 were not involved in the development of our specific research question or outcome measures of  
256 interests.

257 **DISCUSSION**

258 A significant number of patients receive intra-operative transfusion. However, there is  
259 substantial variation in transfusion practice and a paucity of guidance available. Despite the fact  
260 that a plea for intraoperative blood transfusion guidelines was made over 20 years ago, widely  
261 adopted recommendations have yet to be developed. (56) A systematic review of transfusion  
262 guidelines in the intraoperative setting has not previously been performed. Although a quality  
263 appraisal of RBC and plasma guidelines was published in 2018, it did not identify intraoperative  
264 recommendations (34). Additionally, their search strategy did not include guideline clearinghouses  
265 or the grey literature.

266 There are several methodologic strengths of our review, these include multidisciplinary  
267 input, a PRESS reviewed search strategy, review of the grey literature and application of the  
268 AGREE II tool to assess the quality of identified guidelines by four independent reviewers.

*Baker et al. Guidelines on the intraoperative transfusion of red blood cells: a protocol for systematic review*

269 This systematic review will allow for identification, appraisal and summary of literature  
270 devoted to the guidance of intraoperative allogenic RBC transfusion. The Perioperative Anesthesia  
271 Clinical Trials Group (PACT) identified transfusion as 1 of 7 themes that has a significant impact  
272 on mortality, reinforcing the importance of this review (57). The results of this review will provide  
273 rationale and justification for development of guidance, or the need for prospective evaluation of  
274 various intra-operative transfusion strategies. If evidence-informed recommendations for the use  
275 of intra-operative transfusion can be developed and disseminated the incidence of over-transfusion  
276 may be reduced, ensuring responsible use of this limited resource, and minimizing patient  
277 exposure to the risks of transfusion.

278 To achieve this goal will require collaboration between surgeons, anesthetists, and  
279 transfusion specialists. Given the paucity of high quality data on which to base guidelines, this  
280 collaboration must first identifies areas where only expert opinion exists and propose methods for  
281 further examination. The input of patients who have had intra-operative transfusion should be  
282 sought to determine where patient preference may supersede rigorous adherence to guidelines.  
283 Following well planned knowledge translation phase, auditing to monitor compliance with the  
284 guidelines will need to be done. Additionally, following guideline implementation quality assurance  
285 initiatives with patient centred outcomes will also be necessary to ensure that the safety and  
286 tolerability of developed guidelines. Thus, it is unlikely that final guideline recommendations  
287 regarding intra-operative transfusion will be forthcoming in the near future. However, this review  
288 reinforces the urgent need to begin the undertaking.

289  
290 **Acknowledgements:** The authors thank Josee Skuce for her help with developing and PRESS  
291 reviewing the search strategy, as well as retrieving articles.

292 **Funding:** Canadian Blood Services Blood Efficiency and Accelerator Award Program and The  
293 Academic Health Science Center Alternative Funding Plan Innovation Fund.

294 **Competing interests:** None to declare.

295 **Sponsor:** None to declare.

## 296 **Authors' Contribution**

297 All authors were involved in the study conception and design. The protocol was drafted and  
298 registered with PROSPERO by LB, a Master's student in epidemiology at The University of  
299 Ottawa and General Surgery Resident at The Ottawa Hospital. LP is a medical student at The  
300 University of Ottawa. AD is a medical librarian at The Ottawa Hospital. DF, a senior scientist  
301 in clinical epidemiology at The Ottawa Hospital Research Institute, Director of the Clinical  
302 Epidemiology Program, Full Professor in the Department of Medicine, Surgery & School of  
303 Epidemiology and Public Health, provided methodology expertise. GM, a an associate  
304 scientist in clinical epidemiology at The Ottawa Hospital Research Institute, assistant  
305 professor in the department of surgery and attending surgeon in the Liver and Pancreas Unit  
306 at The Ottawa Hospital, provided content and methodologic expertise. All authors reviewed  
307 and approved the final manuscript. GM is the guarantor of the protocol.

308

309

- 310 1. Hendrickson JE, Roubinian NH, Chowdhury D, Brambilla D, Murphy EL, Wu Y, et al. Incidence  
311 of transfusion reactions: a multicenter study utilizing systematic active surveillance and expert  
312 adjudication. *Transfusion*. 2016;56(10):2587-96.
- 313 2. Clinical Guide to Transfusion: Adverse Reactions [Internet]. 2017. Available from:  
314 <https://professionaleducation.blood.ca/en/transfusion/clinical-guide-transfusion>.
- 315 3. Youssef LA, Spitalnik SL. Transfusion-related immunomodulation: a reappraisal. *Curr Opin*  
316 *Hematol*. 2017;24(6):551-7.
- 317 4. Wu HL, Tai YH, Lin SP, Chan MY, Chen HH, Chang KY. The Impact of Blood Transfusion on  
318 Recurrence and Mortality Following Colorectal Cancer Resection: A Propensity Score Analysis of  
319 4,030 Patients. *Sci Rep*. 2018;8(1):13345.
- 320 5. Hallet J, Tsang M, Cheng ES, Habashi R, Kulyk I, Hanna SS, et al. The Impact of Perioperative  
321 Red Blood Cell Transfusions on Long-Term Outcomes after Hepatectomy for Colorectal Liver  
322 Metastases. *Ann Surg Oncol*. 2015;22(12):4038-45.
- 323 6. Xun Y, Tian H, Hu L, Yan P, Yang K, Guo T. The impact of perioperative allogeneic blood  
324 transfusion on prognosis of hepatocellular carcinoma after radical hepatectomy: A systematic review  
325 and meta-analysis of cohort studies. *Medicine (Baltimore)*. 2018;97(43):e12911.
- 326 7. Glance LG, Dick AW, Mukamel DB, Fleming FJ, Zollo RA, Wissler R, et al. Association between  
327 intraoperative blood transfusion and mortality and morbidity in patients undergoing noncardiac  
328 surgery. *Anesthesiology*. 2011;114(2):283-92.
- 329 8. Bernard AC, Davenport DL, Chang PK, Vaughan TB, Zwischenberger JB. Intraoperative  
330 transfusion of 1 U to 2 U packed red blood cells is associated with increased 30-day mortality,  
331 surgical-site infection, pneumonia, and sepsis in general surgery patients. *J Am Coll Surg*.  
332 2009;208(5):931-7, 7 e1-2; discussion 8-9.

- 1  
2  
3 333 9. Bennett S, Baker LK, Martel G, Shorr R, Pawlik TM, Tinmouth A, et al. The impact of  
4 334 perioperative red blood cell transfusions in patients undergoing liver resection: a systematic review.  
5 335 HPB (Oxford). 2017;19(4):321-30.
- 6 336 10. Lyu X, Qiao W, Li D, Leng Y. Impact of perioperative blood transfusion on clinical outcomes in  
7 337 patients with colorectal liver metastasis after hepatectomy: a meta-analysis. *Oncotarget*.  
8 338 2017;8(25):41740-8.
- 9 339 11. Shander A, Hofmann A, Gombotz H, Theusinger OM, Spahn DR. Estimating the cost of blood:  
10 340 past, present, and future directions. *Best Pract Res Clin Anaesthesiol*. 2007;21(2):271-89.
- 11 341 12. Stokes EA, Wordsworth S, Staves J, Mundy N, Skelly J, Radford K, et al. Accurate costs of  
12 342 blood transfusion: a microcosting of administering blood products in the United Kingdom National  
13 343 Health Service. *Transfusion*. 2018;58(4):846-53.
- 14 344 13. Shander A, Hofmann A, Ozawa S, Theusinger OM, Gombotz H, Spahn DR. Activity-based  
15 345 costs of blood transfusions in surgical patients at four hospitals. *Transfusion*. 2010;50(4):753-65.
- 16 346 14. National Blood Inventory 2018 [Available from: <https://blood.ca/en>].
- 17 347 15. Hare GM. Tolerance of anemia: understanding the adaptive physiological mechanisms which  
18 348 promote survival. *Transfus Apher Sci*. 2014;50(1):10-2.
- 19 349 16. Hebert PC, Wells G, Tweeddale M, Martin C, Marshall J, Pham B, et al. Does transfusion  
20 350 practice affect mortality in critically ill patients? Transfusion Requirements in Critical Care (TRICC)  
21 351 Investigators and the Canadian Critical Care Trials Group. *Am J Respir Crit Care Med*.  
22 352 1997;155(5):1618-23.
- 23 353 17. Carson JL, Terrin ML, Noveck H, Sanders DW, Chaitman BR, Rhoads GG, et al. Liberal or  
24 354 restrictive transfusion in high-risk patients after hip surgery. *N Engl J Med*. 2011;365(26):2453-62.
- 25 355 18. Mazer CD, Whitlock RP, Fergusson DA, Belley-Cote E, Connolly K, Khanykin B, et al. Six-  
26 356 Month Outcomes after Restrictive or Liberal Transfusion for Cardiac Surgery. *N Engl J Med*.  
27 357 2018;379(13):1224-33.
- 28 358 19. Carson JL, Grossman BJ, Kleinman S, Tinmouth AT, Marques MB, Fung MK, et al. Red blood  
29 359 cell transfusion: a clinical practice guideline from the AABB\*. *Ann Intern Med*. 2012;157(1):49-58.
- 30 360 20. Wu WC, Smith TS, Henderson WG, Eaton CB, Poses RM, Uttley G, et al. Operative blood loss,  
31 361 blood transfusion, and 30-day mortality in older patients after major noncardiac surgery. *Ann Surg*.  
32 362 2010;252(1):11-7.
- 33 363 21. American Society of Anesthesiologists Task Force on Perioperative Blood T, Adjuvant T.  
34 364 Practice guidelines for perioperative blood transfusion and adjuvant therapies: an updated report by  
35 365 the American Society of Anesthesiologists Task Force on Perioperative Blood Transfusion and  
36 366 Adjuvant Therapies. *Anesthesiology*. 2006;105(1):198-208.
- 37 367 22. Adkins AR, Lee D, Woody DJ, White WA, Jr. Accuracy of blood loss estimations among  
38 368 anesthesia providers. *AANA J*. 2014;82(4):300-6.
- 39 369 23. Barash PG. *Clinical Anesthesia Fundamentals*. Philadelphia: Lippincott Williams & Wilkins;  
40 370 2015.
- 41 371 24. Klein HG, Spahn DR, Carson JL. Red blood cell transfusion in clinical practice. *Lancet*.  
42 372 2007;370(9585):415-26.
- 43 373 25. Bennett S, Tinmouth A, Mclsaac DI, English S, Hebert PC, Karanicolas PJ, et al. Ottawa  
44 374 Criteria for Appropriate Transfusions in Hepatectomy: Using the RAND/UCLA Appropriateness  
45 375 Method. *Ann Surg*. 2018;267(4):766-74.
- 46 376 26. Choy YC, Lim WL, Ng SH. Audit of perioperative blood transfusion. *Med J Malaysia*.  
47 377 2007;62(4):299-302.
- 48 378 27. Spencer J, Thomas SR, Yardy G, Mukundan C, Barrington R. Are we overusing blood  
49 379 transfusing after elective joint replacement?--a simple method to reduce the use of a scarce  
50 380 resource. *Ann R Coll Surg Engl*. 2005;87(1):28-30.
- 51 381 28. Niraj G, Puri GD, Arun D, Chakravarty V, Aveek J, Chari P. Assessment of intraoperative blood  
52 382 transfusion practice during elective non-cardiac surgery in an Indian tertiary care hospital. *Br J*  
53 383 *Anaesth*. 2003;91(4):586-9.

*Baker et al. Guidelines on the intraoperative transfusion of red blood cells: a protocol for systematic review*

- 1  
2  
3 384 29. Mallett SV, Peachey TD, Sanehi O, Hazlehurst G, Mehta A. Reducing red blood cell  
4 385 transfusion in elective surgical patients: the role of audit and practice guidelines. *Anaesthesia*.  
5 386 2000;55(10):1013-9.  
6 387 30. Hallissey MT, Crowson MC, Kiff RS, Kingston RD, Fielding JW. Blood transfusion: an overused  
7 388 resource in colorectal cancer surgery. *Ann R Coll Surg Engl*. 1992;74(1):59-62.  
8 389 31. Bennett S, Ayoub A, Tran A, English S, Tinmouth A, Mclsaac DI, et al. Current practices in  
9 390 perioperative blood management for patients undergoing liver resection: a survey of surgeons and  
10 391 anesthesiologists. *Transfusion*. 2018;58(3):781-7.  
11 392 32. Meier J, Filipescu D, Kozek-Langenecker S, Llau Pitarch J, Mallett S, Martus P, et al.  
12 393 Intraoperative transfusion practices in Europe. *Br J Anaesth*. 2016;116(2):255-61.  
13 394 33. Carson JL, Guyatt G, Heddle NM, Grossman BJ, Cohn CS, Fung MK, et al. Clinical Practice  
14 395 Guidelines From the AABB: Red Blood Cell Transfusion Thresholds and Storage. *JAMA*.  
15 396 2016;316(19):2025-35.  
16 397 34. Pavenski K, Stanworth S, Fung M, Wood EM, Pink J, Murphy MF, et al. Quality of Evidence-  
17 398 Based Guidelines for Transfusion of Red Blood Cells and Plasma: A Systematic Review. *Transfus Med*  
18 399 *Rev*. 2018.  
19 400 35. Kozek-Langenecker SA, Afshari A, Albaladejo P, Santullano CA, De Robertis E, Filipescu DC, et al.  
20 401 al. Management of severe perioperative bleeding: guidelines from the European Society of  
21 402 Anaesthesiology. *Eur J Anaesthesiol*. 2013;30(6):270-382.  
22 403 36. Practice Guidelines for blood component therapy: A report by the American Society of  
23 404 Anesthesiologists Task Force on Blood Component Therapy. *Anesthesiology*. 1996;84(3):732-47.  
24 405 37. Klein AA, Arnold P, Bingham RM, Brohi K, Clark R, Collis R, et al. AAGBI guidelines: the use of  
25 406 blood components and their alternatives 2016. *Anaesthesia*. 2016;71(7):829-42.  
26 407 38. Moll FL, Powell JT, Fraedrich G, Verzini F, Haulon S, Waltham M, et al. Management of  
27 408 abdominal aortic aneurysms clinical practice guidelines of the European society for vascular surgery.  
28 409 *Eur J Vasc Endovasc Surg*. 2011;41 Suppl 1:S1-S58.  
29 410 39. Liberati A, Altman DG, Tetzlaff J, Mulrow C, Gotzsche PC, Ioannidis JP, et al. The PRISMA  
30 411 statement for reporting systematic reviews and meta-analyses of studies that evaluate health care  
31 412 interventions: explanation and elaboration. *PLoS Med*. 2009;6(7):e1000100.  
32 413 40. Moher D, Shamseer L, Clarke M, Ghersi D, Liberati A, Petticrew M, et al. Preferred reporting  
33 414 items for systematic review and meta-analysis protocols (PRISMA-P) 2015 statement. *Syst Rev*.  
34 415 2015;4:1.  
35 416 41. Clinical Practice Guidelines we can trust [press release]. The National Academies Press 2011.  
36 417 42. Rozanski A, Slomka P, D SB. Extending the Use of Coronary Calcium Scanning to Clinical  
37 418 Rather Than Just Screening Populations: Ready for Prime Time? *Circ Cardiovasc Imaging*. 2016;9(5).  
38 419 43. Guidelines International Network [Available from: [www.g-i-n.net](http://www.g-i-n.net)].  
39 420 44. National Institute for Health for Health and Care Excellence (NICE).  
40 421 45. National Health Service (NHS) Evidence.  
41 422 46. Canadian Medical Association Infobase.  
42 423 47. New Zealand Guidelines Group.  
43 424 48. World Health Organization.  
44 425 49. Ulrich-Vinther M, Carmody EE, Goater JJ, K Sb, O'Keefe RJ, Schwarz EM. Recombinant adeno-  
45 426 associated virus-mediated osteoprotegerin gene therapy inhibits wear debris-induced osteolysis. *J*  
46 427 *Bone Joint Surg Am*. 2002;84-A(8):1405-12.  
47 428 50. Balk EM, Chung M, Chen ML, Trikalinos TA, Kong Win Chang L. Assessing the Accuracy of  
48 429 Google Translate to Allow Data Extraction From Trials Published in Non-English Languages. *AHRQ*  
49 430 *Methods for Effective Health Care*. Rockville (MD)2013.  
50 431 51. Brouwers MC, Kho ME, Browman GP, Burgers JS, Cluzeau F, Feder G, et al. AGREE II:  
51 432 advancing guideline development, reporting, and evaluation in health care. *Prev Med*.  
52 433 2010;51(5):421-4.



- 1  
2  
3 434 52. Brouwers MC, Kho ME, Browman GP, Burgers JS, Cluzeau F, Feder G, et al. Development of  
4 435 the AGREE II, part 1: performance, usefulness and areas for improvement. CMAJ.  
5 436 2010;182(10):1045-52.  
6 437 53. Brouwers MC, Kho ME, Browman GP, Burgers JS, Cluzeau F, Feder G, et al. Development of  
7 438 the AGREE II, part 2: assessment of validity of items and tools to support application. CMAJ.  
8 439 2010;182(10):E472-8.  
9 440 54. Guyatt GH, Oxman AD, Vist GE, Kunz R, Falck-Ytter Y, Alonso-Coello P, et al. GRADE: an  
10 441 emerging consensus on rating quality of evidence and strength of recommendations. BMJ.  
11 442 2008;336(7650):924-6.  
12 443 55. Canadian Blood Services Centre for Innovation Intramural Research Grant Program  
13 444 Guidelines 2018 [Available from:  
14 445 [https://blood.ca/sites/default/files/Intramural\\_Research\\_Grant\\_Program\\_Guidelines\\_1.pdf](https://blood.ca/sites/default/files/Intramural_Research_Grant_Program_Guidelines_1.pdf).  
15 446 56. Sudhindran S. Perioperative blood transfusion: a plea for guidelines. Ann R Coll Surg Engl.  
16 447 1997;79(4):299-302.  
17 448 57. Boet S, Etherington N, Nicola D, Beck A, Bragg S, Carrigan ID, et al. Anesthesia interventions  
18 449 that alter perioperative mortality: a scoping review. Syst Rev. 2018;7(1):218.  
19 450  
20  
21  
22  
23  
24  
25  
26  
27  
28  
29  
30  
31  
32  
33  
34  
35  
36  
37  
38  
39  
40  
41  
42  
43  
44  
45  
46  
47  
48  
49  
50  
51  
52  
53  
54  
55  
56  
57  
58  
59  
60

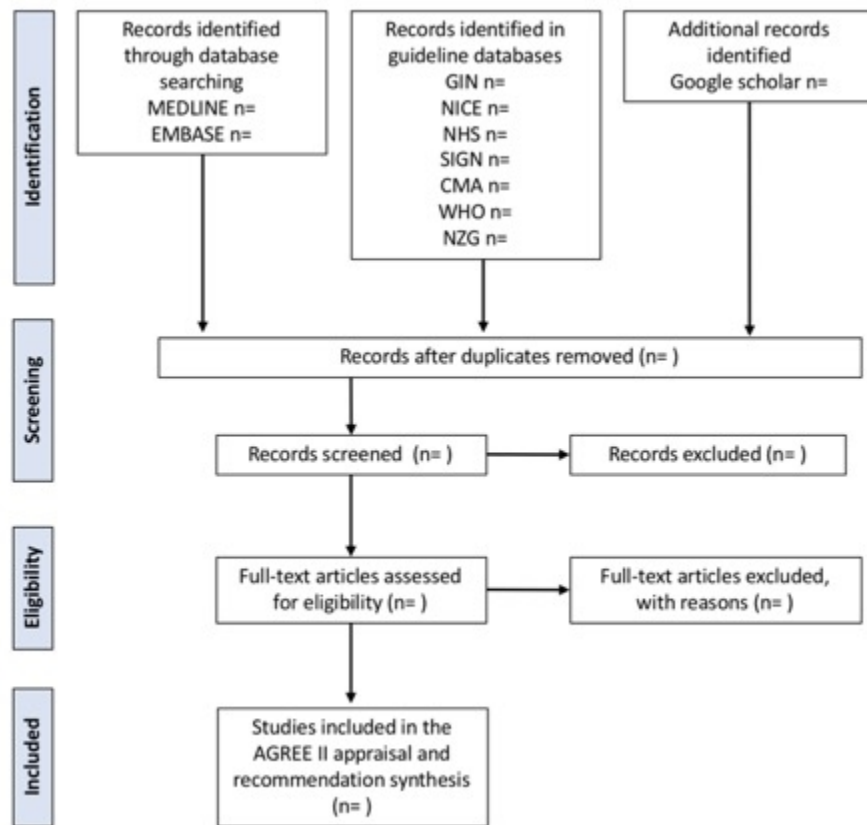

Figure 1: PRISMA Flow Diagram

159x149mm (72 x 72 DPI)

## Appendix I: Search Strategy

Database: Ovid MEDLINE(R) ALL <1946 to January 21, 2019>

Search Strategy:

-----

1 \*blood transfusion/ or blood component transfusion/ or erythrocyte transfusion/ (36153)  
 2 ((red blood cell\$ or rbc or erythrocyte\$ or red cell\$) adj3 (transfus\$ or infus\* or retransfus\*)).tw. (10506)  
 3 (blood adj4 transfus\*).tw. (54555) - I expanded this  
 4 RBCT.tw,kw. (95)  
 5 (RBC transfusion or red blood cell transfusion).kw. (110)  
 6 (hemotransfus\$ or haemotransfus\$).tw,kw. (234)  
 7 or/1-6 (78107)  
 8 INTRAOPERATIVE COMPLICATIONS/ or INTRAOPERATIVE CARE/ or INTRAOPERATIVE PERIOD/  
 9 or Perioperative Care/ (69769)  
 10 (intraoperat\* or intra-operat\* or perioperat\* or peri-operat\*).tw,kw. (205937)  
 11 (surg\* or operat\*).ti. (708792) - added this line  
 12 (transfus\* adj5 (operat\* or surg\*)).tw. (8642)  
 13 ((undergoing or during) adj4 (surg\* or operat\*)).tw. (180983) - expanded this line by taking out  
 14 'transfus\*  
 15 or/8-12 (968870)  
 16 7 and 13 (18339)  
 17 exp clinical pathway/ (6046)  
 18 clinical protocol/ (25911)  
 19 exp consensus/ (9313)  
 20 exp consensus development conference/ (11078)  
 21 exp consensus development conferences as topic/ (2618)  
 22 guidelines as topic/ (37008)  
 23 exp practice guideline/ (24266)  
 24 practice guidelines as topic/ (105996)  
 25 health planning guidelines/ (4007)  
 26 (guideline or practice guideline or consensus development conference or consensus development  
 27 conference, NIH).pt. (39641)  
 28 (standards or guideline or guidelines).ti,kf,kw. (96689)  
 29 ((practice or treatment\* or clinical) adj guideline\*).ab. (33765)  
 30 (CPG or CPGs).ti. (5320)  
 31 consensus\*.ti,kf,kw. (22038)  
 32 ((critical or clinical or practice) adj2 (path or paths or pathway or pathways or protocol\*)).ti,ab,kf,kw.  
 33 (17432)  
 34 recommendat\*.ti,kf,kw. (35650)  
 35 or/15-30 (334141)  
 36 14 and 31 (550)  
 37 (rbc transfusion\* or red blood cell\* transfusion\*).ti. (1054)  
 38 (transfus\* and (intraoperat\* or intra-operat\* or perioperat\* or peri-operat\*)).ti. (1014)  
 39 33 or 34 (1999)  
 40 (guideline or practice guideline or consensus development conference or consensus development  
 41 conference, NIH).pt. (39641)  
 42 (standards or guideline or guidelines).ti,kf,kw. (96689)  
 43 36 or 37 (122196)  
 44 35 and 38 (61)  
 45 32 or 39 (578)  
 46 animals/ not humans/ (4465996)  
 47 40 not 41 (577)  
 48 (exp infants/ or child/) not adult/ (1517431)  
 49 42 not 43 (546)

## PRISMA-P 2015 Checklist

This checklist has been adapted for use with protocol submissions to *Systematic Reviews* from Table 3 in Moher D et al: Preferred reporting items for systematic review and meta-analysis protocols (PRISMA-P) 2015 statement. *Systematic Reviews* 2015 4:1

| Section/topic                     | #  | Checklist item                                                                                                                                                                                  | Information reported     |                          | Line number(s) |
|-----------------------------------|----|-------------------------------------------------------------------------------------------------------------------------------------------------------------------------------------------------|--------------------------|--------------------------|----------------|
|                                   |    |                                                                                                                                                                                                 | Yes                      | No                       |                |
| <b>ADMINISTRATIVE INFORMATION</b> |    |                                                                                                                                                                                                 |                          |                          |                |
| <b>Title</b>                      |    |                                                                                                                                                                                                 |                          |                          |                |
| Identification                    | 1a | Identify the report as a protocol of a systematic review                                                                                                                                        | x                        | <input type="checkbox"/> | 1-2            |
| Update                            | 1b | If the protocol is for an update of a previous systematic review, identify as such                                                                                                              | <input type="checkbox"/> | x                        | N/A            |
| <b>Registration</b>               | 2  | If registered, provide the name of the registry (e.g., PROSPERO) and registration number in the Abstract                                                                                        | x                        | <input type="checkbox"/> | 49             |
| <b>Authors</b>                    |    |                                                                                                                                                                                                 |                          |                          |                |
| Contact                           | 3a | Provide name, institutional affiliation, and e-mail address of all protocol authors; provide physical mailing address of corresponding author                                                   | x                        | <input type="checkbox"/> | 4-33           |
| Contributions                     | 3b | Describe contributions of protocol authors and identify the guarantor of the review                                                                                                             | x                        | <input type="checkbox"/> | 296-307        |
| <b>Amendments</b>                 | 4  | If the protocol represents an amendment of a previously completed or published protocol, identify as such and list changes; otherwise, state plan for documenting important protocol amendments | x                        | <input type="checkbox"/> | 149-150        |
| <b>Support</b>                    |    |                                                                                                                                                                                                 |                          |                          |                |
| Sources                           | 5a | Indicate sources of financial or other support for the review                                                                                                                                   | x                        | <input type="checkbox"/> | 292-293        |
| Sponsor                           | 5b | Provide name for the review funder and/or sponsor                                                                                                                                               | x                        | <input type="checkbox"/> | 295            |
| Role of sponsor/funder            | 5c | Describe roles of funder(s), sponsor(s), and/or institution(s), if any, in developing the protocol                                                                                              | <input type="checkbox"/> | x                        | N/A            |
| <b>INTRODUCTION</b>               |    |                                                                                                                                                                                                 |                          |                          |                |
| <b>Rationale</b>                  | 6  | Describe the rationale for the review in the context of what is already known                                                                                                                   | x                        | <input type="checkbox"/> | 62-135         |
| <b>Objectives</b>                 | 7  | Provide an explicit statement of the question(s) the review will address with reference to participants, interventions, comparators, and outcomes (PICO)                                        | x                        | <input type="checkbox"/> | 138-141        |

| Section/topic                             | #   | Checklist item                                                                                                                                                                                                                              | Information reported     |                          | Line number(s) |
|-------------------------------------------|-----|---------------------------------------------------------------------------------------------------------------------------------------------------------------------------------------------------------------------------------------------|--------------------------|--------------------------|----------------|
|                                           |     |                                                                                                                                                                                                                                             | Yes                      | No                       |                |
| <b>METHODS</b>                            |     |                                                                                                                                                                                                                                             |                          |                          |                |
| <b>Eligibility criteria</b>               | 8   | Specify the study characteristics (e.g., PICO, study design, setting, time frame) and report characteristics (e.g., years considered, language, publication status) to be used as criteria for eligibility for the review                   | x                        | <input type="checkbox"/> | 151-165        |
| <b>Information sources</b>                | 9   | Describe all intended information sources (e.g., electronic databases, contact with study authors, trial registers, or other grey literature sources) with planned dates of coverage                                                        | x                        | <input type="checkbox"/> | 166-180        |
| <b>Search strategy</b>                    | 10  | Present draft of search strategy to be used for at least one electronic database, including planned limits, such that it could be repeated                                                                                                  | x                        | <input type="checkbox"/> | Appendix 1     |
| <b>STUDY RECORDS</b>                      |     |                                                                                                                                                                                                                                             |                          |                          |                |
| Data management                           | 11a | Describe the mechanism(s) that will be used to manage records and data throughout the review                                                                                                                                                | x                        | <input type="checkbox"/> | 181-190        |
| Selection process                         | 11b | State the process that will be used for selecting studies (e.g., two independent reviewers) through each phase of the review (i.e., screening, eligibility, and inclusion in meta-analysis)                                                 | x                        | <input type="checkbox"/> | 183-189        |
| Data collection process                   | 11c | Describe planned method of extracting data from reports (e.g., piloting forms, done independently, in duplicate), any processes for obtaining and confirming data from investigators                                                        | x                        | <input type="checkbox"/> | 196-198        |
| <b>Data items</b>                         | 12  | List and define all variables for which data will be sought (e.g., PICO items, funding sources), any pre-planned data assumptions and simplifications                                                                                       | x                        | <input type="checkbox"/> | 191-196        |
| <b>Outcomes and prioritization</b>        | 13  | List and define all outcomes for which data will be sought, including prioritization of main and additional outcomes, with rationale                                                                                                        | x                        | <input type="checkbox"/> | 199-202        |
| <b>Risk of bias in individual studies</b> | 14  | Describe anticipated methods for assessing risk of bias of individual studies, including whether this will be done at the outcome or study level, or both; state how this information will be used in data synthesis                        | x                        | <input type="checkbox"/> | 206-228        |
| <b>DATA</b>                               |     |                                                                                                                                                                                                                                             |                          |                          |                |
| <b>Synthesis</b>                          | 15a | Describe criteria under which study data will be quantitatively synthesized                                                                                                                                                                 | x                        | <input type="checkbox"/> | 229-232        |
|                                           | 15b | If data are appropriate for quantitative synthesis, describe planned summary measures, methods of handling data, and methods of combining data from studies, including any planned exploration of consistency (e.g., $I^2$ , Kendall's tau) | <input type="checkbox"/> | x                        | N/A            |
|                                           | 15c | Describe any proposed additional analyses (e.g., sensitivity or subgroup analyses, meta-regression)                                                                                                                                         | x                        | <input type="checkbox"/> | 233-235        |
|                                           | 15d | If quantitative synthesis is not appropriate, describe the type of summary planned                                                                                                                                                          | x                        | <input type="checkbox"/> | 229-232        |

| Section/topic                            | #  | Checklist item                                                                                                              | Information reported     |    | Line number(s) |
|------------------------------------------|----|-----------------------------------------------------------------------------------------------------------------------------|--------------------------|----|----------------|
|                                          |    |                                                                                                                             | Yes                      | No |                |
| <b>Meta-bias(es)</b>                     | 16 | Specify any planned assessment of meta-bias(es) (e.g., publication bias across studies, selective reporting within studies) | <input type="checkbox"/> | x  | N/A            |
| <b>Confidence in cumulative evidence</b> | 17 | Describe how the strength of the body of evidence will be assessed (e.g., GRADE)                                            | <input type="checkbox"/> | x  | N/A            |

For peer review only

# BMJ Open

## Guidelines on the intraoperative transfusion of red blood cells: a protocol for systematic review

|                                 |                                                                                                                                                                                                                                                                                                                                                                                                                                                                                                                                                                                                                                                                                                                                                                                                                                                                                                       |
|---------------------------------|-------------------------------------------------------------------------------------------------------------------------------------------------------------------------------------------------------------------------------------------------------------------------------------------------------------------------------------------------------------------------------------------------------------------------------------------------------------------------------------------------------------------------------------------------------------------------------------------------------------------------------------------------------------------------------------------------------------------------------------------------------------------------------------------------------------------------------------------------------------------------------------------------------|
| Journal:                        | <i>BMJ Open</i>                                                                                                                                                                                                                                                                                                                                                                                                                                                                                                                                                                                                                                                                                                                                                                                                                                                                                       |
| Manuscript ID                   | bmjopen-2019-029684.R1                                                                                                                                                                                                                                                                                                                                                                                                                                                                                                                                                                                                                                                                                                                                                                                                                                                                                |
| Article Type:                   | Protocol                                                                                                                                                                                                                                                                                                                                                                                                                                                                                                                                                                                                                                                                                                                                                                                                                                                                                              |
| Date Submitted by the Author:   | 08-Mar-2019                                                                                                                                                                                                                                                                                                                                                                                                                                                                                                                                                                                                                                                                                                                                                                                                                                                                                           |
| Complete List of Authors:       | Baker, Laura; The Ottawa Hospital, General Surgery; Ottawa Hospital Research Institute<br>Park, Lily; The Ottawa Hospital, General Surgery<br>Gilbert, Richard; The Ottawa Hospital, General Surgery<br>Martel, Andre; The Ottawa Hospital, General Surgery<br>Ahn, Hilalion; The Ottawa Hospital, General Surgery<br>Davis, Alexandra; Ottawa Hospital Research Institute<br>McIsaac, Daniel; The Ottawa Hospital, Anesthesiology and Pain Medicine<br>Saidenberg, Elianna; Ottawa Hospital, Pathology and Lab Medicine; The Ottawa Hospital<br>Tinmouth, Alan ; The Ottawa Hospital, Division of Hematology, Department of Medicine; Ottawa Hospital Research Institute, Medicine<br>Fergusson, Dean; Ottawa Hospital Research Institute, Medicine<br>Martel, Guillaume; Ottawa Hospital, Liver and Pancreas Unit, Department of Surgery; Ottawa Hospital Research Institute, Clinical Epidemiology |
| <b>Primary Subject Heading</b>: | Surgery                                                                                                                                                                                                                                                                                                                                                                                                                                                                                                                                                                                                                                                                                                                                                                                                                                                                                               |
| Secondary Subject Heading:      | Anaesthesia, Evidence based practice                                                                                                                                                                                                                                                                                                                                                                                                                                                                                                                                                                                                                                                                                                                                                                                                                                                                  |
| Keywords:                       | Protocols & guidelines < HEALTH SERVICES ADMINISTRATION & MANAGEMENT, SURGERY, Blood bank & transfusion medicine < HAEMATOLOGY, Adult anaesthesia < ANAESTHETICS, Paediatric anaesthesia < ANAESTHETICS                                                                                                                                                                                                                                                                                                                                                                                                                                                                                                                                                                                                                                                                                               |
|                                 |                                                                                                                                                                                                                                                                                                                                                                                                                                                                                                                                                                                                                                                                                                                                                                                                                                                                                                       |

SCHOLARONE™  
Manuscripts

*Baker et al. Guidelines on the intraoperative transfusion of red blood cells: a protocol for systematic review*

**Guidelines on the intraoperative transfusion of red blood cells: a protocol for systematic review**

Laura Baker<sup>1,2,3,4</sup>, Lily Park<sup>4</sup>, Richard Gilbert<sup>1,4</sup>, Andre Martel<sup>1,4</sup>, Hilalion Ahn<sup>4</sup>, Alexandra Davies<sup>5</sup>, Daniel McIsaac<sup>2,3,6</sup>, Elianna Saidenberg<sup>2,7</sup>, Alan Tinmouth<sup>2,3,7</sup>, Dean Fergusson<sup>2,3</sup>, Guillaume Martel<sup>1,2,3</sup>

Liver and Pancreas Unit, Department of Surgery, The Ottawa Hospital<sup>1</sup>

Ottawa Hospital Research Institute<sup>2</sup>

School of Epidemiology and Public Health, Faculty of Medicine, The University of Ottawa<sup>3</sup>

Faculty of Medicine, The University of Ottawa<sup>4</sup>

Learning Services, The Ottawa Hospital<sup>5</sup>

Departments of Anesthesiology & Pain Medicine, University of Ottawa and The Ottawa Hospital<sup>6</sup>

Division of Hematology, Department of Medicine, The Ottawa Hospital<sup>7</sup>

**Corresponding author:**

Guillaume Martel, MD, MSc, FRCSC, FACS

501 Smyth Road, CCW 1667

Ottawa, ON K1H 8L6

gumartel@toh.ca

Tel.: +1-613-737-8899, ext. 71053

**Additional authors:**

Laura Baker laurbaker@toh.ca

Lily Park lpark016@uottawa.ca

Richard Gilbert rigilbert@toh.ca

Andre Martel anmartel@toh.ca

Hilalion San hahn066@uottawa.ca



*Baker et al. Guidelines on the intraoperative transfusion of red blood cells: a protocol for systematic review*

28  
29 Daniel McIsaac [dmcisaac@toh.ca](mailto:dmcisaac@toh.ca)  
30  
31 Elianna Saidenberg [esaidenberg@toh.ca](mailto:esaidenberg@toh.ca)  
32 Alan Tinmouth [atinmouth@toh.ca](mailto:atinmouth@toh.ca)  
33 Dean Fergusson [dafergusson@ohri.ca](mailto:dafergusson@ohri.ca)

## **ABSTRACT**

**Introduction** A significant proportion of red blood cell transfusions are administered intraoperatively; yet there is limited evidence to guide transfusion decisions in this setting. The objective of this systematic review is to explore the availability, quality and content of clinical practice guidelines (CPG) reporting on the indication for allogenic RBC transfusion in the intraoperative setting.

**Methods** Major electronic databases (MEDLINE, EMBASE and CINAHL), guideline clearinghouses and Google Scholar, will be systematically searched from inception to January 2019 for CPGs pertaining to indications for intraoperative allogenic RBC transfusion. Characteristics of eligible guidelines will be reported in a summary table. The AGREE II instrument will be used to appraise the quality of identified guidelines. Recommendations advising on indications for intraoperative RBC transfusion will be manually extracted and presented to allow for comparison of similarities and/or discrepancies in the literature. .

**Ethics and dissemination** The results of this systematic review will be disseminated through relevant conferences and peer-reviewed journals.

**Protocol registration number** PROSPERO CRD42018111487

### **Strengths and limitations of this study:**

- The proposed study is the first systematic review to identify the availability of practice guidelines advising on intraoperative red blood cell transfusion
- A multidisciplinary group of methodologic and content experts are involved in this review
- The search strategy will be PRESS reviewed
- Guidelines in all languages will be considered for inclusion

*Baker et al. Guidelines on the intraoperative transfusion of red blood cells: a protocol for systematic review*

- 1  
2  
3 57 • The Appraisal of Guidelines for Research and Evaluation II (AGREE II) instrument, an  
4  
5 58 internationally validated tool, will be utilized to assess the quality of guidelines by four  
6  
7 59 independent reviewers  
8  
9  
10 60

11 **INTRODUCTION**  
12

13 62 Red blood cell (RBC) transfusions although potentially lifesaving, are a costly and limited  
14 63 resource, associated with possible harm. Potential adverse outcomes range in severity, from minor  
15 64 to life-threatening. Relatively mild reactions include febrile non-hemolytic transfusion reactions,  
16 65 minor allergic reactions, or development of RBC alloantibodies. RBC alloantibodies can usually be  
17 66 managed with the provision of antigen negative products (1)(2). However, in the case of rare  
18 67 antibodies, development of alloantibodies can complicate administration of future blood products  
19 68 (1). Life-threatening transfusion reactions include anaphylaxis, transfusion related acute lung injury,  
20 69 bacterial contamination of blood products resulting in sepsis, acute hemolytic transfusion reactions,  
21 70 and transfusion associated circulatory overload (1)(2). While the risk of transfusion transmitted viral  
22 71 infections has dropped drastically in recent years and the risk of this occurring is extremely low, it  
23 72 remains a concern when deciding to transfuse patients (2). RBC transfusions may also cause  
24 73 immunosuppression in the recipient, a process called “transfusion-related immunomodulation  
25 74 (TRIM) (3). TRIM provides rationale for the negative association observed between RBC transfusion  
26 75 and post-operative adverse events as well as cancer recurrence in patients undergoing oncology  
27 76 surgery (4) (5) (6) (7) (8) (9) (10). At an estimated price tag of 102-761 USD per unit, RBC  
28 77 transfusions are costly (11) (12) (13) (14). They are also in short supply, relying on altruistic blood  
29 78 donors to ensure inventory stability (15) (16). Given their associated risk, expense and scarcity, it is  
30 79 critical they are administered wisely.  
31  
32  
33  
34  
35  
36  
37  
38  
39  
40  
41  
42  
43  
44  
45  
46  
47  
48  
49  
50

51 80 There has been significant evolution in our understanding of humans’ ability to tolerate  
52 81 anemia; resulting in a shift in approach to RBC transfusion prescribing practices from the “10/30”  
53 82 rule (i.e. transfusion indicated below a hemoglobin of 10g/L or hematocrit <30%) to the widely  
54 83 accepted transfusion trigger of 70g/L in the asymptomatic patient without significant cardiac  
55  
56  
57  
58  
59  
60

*Baker et al. Guidelines on the intraoperative transfusion of red blood cells: a protocol for systematic review*

84 comorbidity. This change came into effect following reporting of the TRICC trial and others that have  
85 shown the safety of a restrictive transfusion threshold (17, 18) (19) (20). Importantly, the findings of  
86 these studies, which have impacted transfusion practices across a broad spectrum of clinical  
87 scenarios, are not necessarily applicable in the operative setting.

88 The operative setting presents a unique situation in which the indications for transfusion  
89 commonly reported in the non-operative patient have limited transferability. As blood loss, and  
90 consequently hemoglobin concentration can be unpredictable during surgery, hemoglobin  
91 concentrations may drop suddenly, making previous measurements of hemoglobin concentration  
92 invalid. This limits the feasibility of utilizing specific hemoglobin levels to guide RBC transfusion  
93 administration in surgical patients (21). There is some literature to suggest estimated surgical blood  
94 loss can be utilized to guide transfusion decisions (22) (23). However, there is good evidence to  
95 support the inability of clinicians to accurately predict blood loss (24). It is also important to  
96 appreciate that not all intraoperative bleeding is the same, varying from a persistent, slow ooze, to  
97 massive, rapid blood loss from a major vessel. Additionally, reliance on hemodynamics is complex  
98 as in addition to blood loss, it is a reflection of multiple variables, including but not limited to:  
99 anesthetic agents, patient positioning, presence of pneumoperitoneum and neurologic stimulation  
100 (25). In the non-operative setting, acute blood loss of approximately 20% results in a compensatory  
101 tachycardia (26). However, because of the other variables at play in the anesthetized patient,  
102 tachycardia is not a reliable marker of blood loss. Another common recommendation is to monitor  
103 for the presence of inadequate perfusion and oxygenation of vital organs (23). The ability to monitor  
104 for symptoms of decreased end-organ perfusion such as decreased level of consciousness, chest  
105 pain, or abdominal pain, are not possible in the unconscious patient under general anesthesia.  
106 Incorporation of decision rules specific to surgical patient, such as monitoring for ST changes, are  
107 fundamental to guiding appropriate RBC transfusion for a patient under general anesthesia for  
108 surgery(27). Another aspect unique to the unconscious patient under general anesthesia, subject to  
109 dynamic changes in hemodynamics for a number of reasons, is our limited ability to identify  
110 transfusion reactions. Although literature in this area is lacking, it would be reasonable to

*Baker et al. Guidelines on the intraoperative transfusion of red blood cells: a protocol for systematic review*

111 hypothesize that transfusion reactions in the intra-operative setting are underreported. This, in  
112 combination with the evidence that patients who receive intraoperative transfusions suffer increased  
113 short and long term morbidity, advocates for careful consideration of transfusion administration (28)  
114 (7).

115 The uncertainty of transfusion indications in this patient population is demonstrated by the  
116 abundance of literature reporting on the wide variability in transfusion practices but largely reporting  
117 over-transfusion of surgical patients (29) (30) (31) (32) (33). A recent survey of Canadian liver  
118 surgeons and anesthesiologists highlights the lack of consensus between practitioners regarding  
119 indications for transfusion. In response to the question “what is the most important information you  
120 use to decide on intraoperative transfusion,” the majority of anesthesiologist selected hemoglobin  
121 value (47.2% vs 19% of surgeons;  $p < 0.05$ ), whereas surgeons selected hemodynamics (33.4% vs  
122 14% of anesthesiologist;  $p > 0.05$ ) (34). A prospective observational study of intraoperative  
123 transfusion practices in Europe reported “physiologic trigger irrespective of hemoglobin” as the most  
124 common indication for transfusion in a cohort of 5803 patients (35). Despite a global shift to a more  
125 restrictive transfusion strategy, wide variability in practice patterns in the intraoperative setting exists,  
126 and therefore warrants a review of the recommendations.

127 A preliminary search reveals guidance pertaining to RBC transfusion in the intraoperative  
128 patient population is lacking. Recently published guidelines from AABB, a worldwide leader in  
129 producing clinical practice guidelines for utilization of blood components, neglected to provide  
130 recommendations on indications for RBC transfusion in the intraoperative setting likely due to a lack  
131 of evidence on which to base recommendations (36). Guidelines endorsed by surgical and  
132 anesthesia societies offer vague recommendations with limited directives for when to transfuse, for  
133 example, to monitor for blood loss, check hemoglobin or hematocrit prior to transfusion, adopt a  
134 restrictive transfusion strategy or assess for adequate perfusion and oxygenation (37) (38) (39) (40)  
135 (41). As alluded to previously, reliance on these variables is limited in the intraoperative period. A  
136 formal review of the literature to understand available guidance for intraoperative RBC decisions is  
137 necessary.

*Baker et al. Guidelines on the intraoperative transfusion of red blood cells: a protocol for systematic review*

138 In summary, blood transfusions are associated with possible harm and over-transfusion in  
139 the intraoperative setting is common. Although there is an abundance of guidance pertaining to  
140 indications for RBC transfusion, a review of guidance dedicated to the intraoperative patient does  
141 not currently exist.

142

143 **OBJECTIVE**

144 The objective of this systematic review is to explore the availability, quality and consistency  
145 of published guidelines reporting on the indication for allogenic red blood cell transfusion in the  
146 intraoperative setting. We also aim to summarize the existing recommendations and associated  
147 level of evidence.

148

149 **METHODS**

150 The Preferred Reporting Items for Systematic Review and Meta-analysis Protocols  
151 (PRISMA-P) checklist guidelines were referenced for development of this protocol (42) (43). A  
152 PRISMA-P checklist is available as a supplementary document. The protocol was registered with  
153 the PROSPERO International Prospective Register of Systematic Reviews on October 16, 2018  
154 (CRD42018111487).

155 Any amendments made to the current protocol will be published using a protocol addendum,  
156 accompanied by the date of and rationale for the reported amendment, with the final manuscript.

157 ***Eligibility criteria:***

158 Guidelines reporting on indications for allogenic red blood cell transfusion in the  
159 intraoperative setting will be considered for inclusion. Our definition of clinical practice guidelines is  
160 adopted from the Institute of Medicine and National Guideline Clearinghouse which define them as  
161 recommendations, derived from systematic review of evidence, from collective opinions of an expert  
162 panel, aimed at health care providers intended to improve patient care (44, 45). An article will be  
163 included if it: (1) is presented as a clinical practice guideline; (2) is based on a systematic review of  
164 evidence; (3) is produced by a medical association, professional society, public or private

*Baker et al. Guidelines on the intraoperative transfusion of red blood cells: a protocol for systematic review*

165 organization or government agency and not by an individual(s) not sponsored or supported by the  
166 above groups; (4) includes recommendations for indications for allogenic red blood cell transfusion  
167 in patients undergoing general anesthesia in an operating room; (5) in any language; (6) full-text  
168 available.

169 We plan on excluding: (1) documents that do not meet the definition of a guideline as stated  
170 above; (2) guidelines pertaining to the perioperative period that do not make specific  
171 recommendations on the intraoperative setting (3) previous documents replaced by updated  
172 versions from the same organization.

**173 Information sources and search strategy**

174 MEDLINE (OVID interface, including In-Process and Epub Ahead of Print) and EMBASE  
175 (OVID interface) and CINHALL will be systematically searched from inception to January 2019,  
176 through application of a search strategy developed by a health science librarian with expertise in  
177 systematic reviews. Search terms will include 'allogenic red blood cell transfusion', 'guideline' and  
178 'operative'. The search will not be restricted by date, language or patient population (ie. adult versus  
179 pediatric). A Peer Review of Electronic Search Strategies (PRESS) will be performed by a second  
180 information specialist who is not associated with the project. A draft search strategy for Medline  
181 can be found in Appendix 1. The following guideline-specific databases will also be searched:  
182 National Institute for Health and Care Excellence (NICE) (UK), the Canadian Medical Association  
183 Infobase (Canada), the G-I-N International Guideline Library, the New Zealand Guidelines (NZG)  
184 Group, The World Health Organization and the Scottish Intercollegiate Guidelines Network (SIGN)  
185 (46-51). Google Scholar will be searched with '(intraoperative OR perioperative) AND (guideline  
186 OR consensus OR recommendation OR statement)' and the first 200 records will be screened.  
187 References of identified articles will be reviewed for relevant guidelines.

**188 Study Records**

189 Articles identified through the electronic databases (MEDLINE and EMBASE) will be  
190 imported into Covidence, an online citation manager (52). All titles and abstracts identified will be  
191 independently screened by two reviewers for relevance and categorized as relevant, possibly

*Baker et al. Guidelines on the intraoperative transfusion of red blood cells: a protocol for systematic review*

192 relevant, or irrelevant. Articles categorized as relevant or possibly relevant will be retrieved for further  
193 evaluation. Full texts will also reviewed in duplicate for eligibility. Google translate will be used to  
194 translate non-English, non-French articles, with the exception of those written in Chinese (53). Any  
195 disagreement regarding relevancy will be resolved by a senior author, independent from the  
196 reviewers. Reason for study exclusion will be documented and presented in the PRISMA flow  
197 diagram for study screening (Figure 1).

198 Guidelines identified from the guideline repositories will be recorded in an Excel spread sheet.

### 199 **Data Items**

200 Data pertaining to the publication details (authors, year of publication, journal, etc) will be  
201 identified. All relevant recommendations will be extracted from the guidelines to aid in the  
202 determination of population(s) in which the intraoperative transfusion guidelines pertain to (type of  
203 surgery), patient variables taken into consideration in determining appropriateness for transfusion,  
204 and grading of recommendation if assigned will be extracted. We will identify whether or not the  
205 following variables are accounted for in identified decision rules or recommendations: patient  
206 comorbidities-specifically a history of coronary artery disease, hemodynamics (hypotension,  
207 tachycardia, or presence of vasopressor support), estimated blood loss, evidence of cardiac  
208 ischemia, and evidence of end organ ischemia in addition to cardiac. Data extraction forms (DEF)  
209 will be developed and piloted independently by two reviewers on a set of 5 randomly selected  
210 guidelines. Modifications will be made to the DEF as necessary. Data will be extracted  
211 independently by two reviewers, in duplicate.

### 212 **Outcomes & Prioritization**

213 The objectives are to (1) characterize the clinical practice guidelines advising on  
214 intraoperative RBC utilization (2) appraise their quality and (3) provide a descriptive summary of the  
215 included guidelines.

### 216 **Characterization of identified guidelines**

217 A descriptive table of identified guidelines will be presented. This table will include  
218 information publication information as well as the target patient population of the guideline.

**219 Guideline quality assessment: AGREE II**

220 The Appraisal of Guidelines for Research and Evaluation II (AGREE II) instrument will be  
221 used to assess the quality of included guidelines (54). The AGREE II instrument is a validated  
222 questionnaire aimed at assessing the methodologic quality of clinical practice guidelines and has  
223 been widely adopted in the scientific literature (54) (55) (56). It is comprised of 23 questions scored  
224 on a seven-point Likert scale (whereby 7 indicates the highest quality), covering 6 domains, inclusive  
225 of scope and purpose of the guidelines, stakeholder involvement, rigour of development, clarity of  
226 presentation and editorial independent. There are two additional questions. The first assesses the  
227 overall quality of the guideline, rated on a seven-point Likert scale. The final question asks the  
228 evaluator whether they would recommend using this guideline, to which the assessor responds  
229 "yes," "yes, with modifications," or "no."

230 It is recommended that four assessors complete the AGREE II to achieve an intra-class  
231 correlation coefficient  $\geq 0.7$ . Four appraisers will therefore be selected to complete the online training  
232 and independently evaluate the included guidelines. Once complete, the evaluators will meet and  
233 discuss any scores differing by more than 1 point. At that point, evaluators can amend or keep their  
234 original score. Inter-rater reliability will be calculated using the intraclass correlation coefficient (ICC)  
235 using SAS.

236 Domain scores will be reported separately using both the median and scaled domain scores,  
237 as is recommended by the AGREE II consortium. The scaled domain score will be calculated as  
238 follows: (obtained score-minimal possible score)/(maximal possible score-minimal possible  
239 score)=\_\_%. The minimum possible score is calculated as: (number of questions) x (number of  
240 reviewers) x 1. The maximum possible score is calculated as: (number of questions) x (number of  
241 reviewers) x 7.

**242 Recommendation synthesis**

243 A descriptive table of included studies will be presented displaying all recommendations  
244 pertaining to indications for RBC transfusion in the intraoperative period. Recommendations will be  
245 compared for consistency and/or repetition.



*Baker et al. Guidelines on the intraoperative transfusion of red blood cells: a protocol for systematic review*

1  
2  
3 246 **Analysis of subgroups or subsets**

4  
5 247 Guidelines pertaining to indications for blood transfusion in cardiac versus non-cardiac  
6  
7 248 surgery patients will be grouped and considered separately. In addition, guidelines published  
8  
9 249 following publication of the TRICC trial in May 1997 will be considered separately in our descriptive  
10  
11 250 analysis (18). The rationale for this being that the prevailing theme of current practice is a result of  
12  
13 251 this trial.

14  
15 252 **Dissemination**

16  
17  
18 253 The results of this review will be submitted for presentation at national and international  
19  
20 254 meetings and publication in a peer-reviewed journal.

21  
22 255 **Reporting of review**

23  
24 256 The findings of this systematic review will be reported according to the Preferred Reporting  
25  
26 257 Items for Systematic Reviews and Meta-analyses (PRISMA) statement. The completed checklist  
27  
28 258 will be provided as supplementary material.

29  
30 259 **Confidence in cumulative evidence**

31  
32  
33 260 The quality of recommendations will be evaluated by using the systematic and  
34  
35 261 comprehensive approach known as Grading of Recommendations, Assessment, Development and  
36  
37 262 Evaluations (GRADE) (57). The quality of evidence will be assessed across the domains of risk of  
38  
39 263 bias, consistency, directness, precision and publication bias.

40  
41 264 **Patient and public involvement**

42  
43  
44 265 This investigation is aligned with research priorities established by The Canadian Blood  
45  
46 266 Services (CBS), a not-for-profit charitable organization, responsible for managing the Canadian  
47  
48 267 blood supply (with the exception of Quebec) (58). Specifically, they have identified: (1) promoting  
49  
50 268 appropriate blood product utilization and (2) ensuring an adequate blood product supply, as two of  
51  
52 269 five research priorities. CBS invites public participation in their bi-annual board meetings, where a  
53  
54 270 number of issues are addressed, inclusive of priority research agendas. Patients or the public

*Baker et al. Guidelines on the intraoperative transfusion of red blood cells: a protocol for systematic review*

271 were not involved in the development of our specific research question or outcome measures of  
272 interests.

273 **DISCUSSION**

274 A significant number of patients receive intra-operative transfusion. However, there is  
275 substantial variation in transfusion practice and a paucity of guidance available. Despite the fact  
276 that a plea for intraoperative blood transfusion guidelines was made over 20 years ago, widely  
277 adopted recommendations have yet to be developed. (59) A systematic review of transfusion  
278 guidelines in the intraoperative setting has not previously been performed. Although a quality  
279 appraisal of RBC and plasma guidelines was published in 2018, it did not identify intraoperative  
280 recommendations (37). Additionally, their search strategy did not include guideline clearinghouses  
281 or the grey literature.

282 There are several methodologic strengths of our review, these include multidisciplinary  
283 input, a PRESS reviewed search strategy, review of the grey literature and application of the  
284 AGREE II tool to assess the quality of identified guidelines by four independent reviewers.

285 This systematic review will allow for identification, appraisal and summary of literature  
286 devoted to the guidance of intraoperative allogenic RBC transfusion. The Perioperative Anesthesia  
287 Clinical Trials Group (PACT) identified transfusion as 1 of 7 themes that has a significant impact  
288 on mortality, reinforcing the importance of this review (60). The results of this review will provide  
289 rationale and justification for development of guidance, or the need for prospective evaluation of  
290 various intra-operative transfusion strategies. If evidence-informed recommendations for the use  
291 of intra-operative transfusion can be developed and disseminated the incidence of over-transfusion  
292 may be reduced, ensuring responsible use of this limited resource, and minimizing patient  
293 exposure to the risks of transfusion.

294 To achieve this goal will require collaboration between surgeons, anesthetists, and  
295 transfusion specialists. Given the paucity of high quality data on which to base guidelines, this  
296 collaboration must first identifies areas where only expert opinion exists and propose methods for

*Baker et al. Guidelines on the intraoperative transfusion of red blood cells: a protocol for systematic review*

1  
2  
3 297 further examination. The input of patients who have had intra-operative transfusion should be  
4  
5 298 sought to determine where patient preference may supersede rigorous adherence to guidelines.  
6  
7 299 Following well planned knowledge translation phase, auditing to monitor compliance with the  
8  
9 300 guidelines will need to be done. Additionally, following guideline implementation quality assurance  
10  
11 301 initiatives with patient centred outcomes will also be necessary to ensure that the safety and  
12  
13 302 tolerability of developed guidelines. Thus, it is unlikely that final guideline recommendations  
14  
15 303 regarding intra-operative transfusion will be forthcoming in the near future. However, this review  
16  
17 304 reinforces the urgent need to begin the undertaking.  
18  
19  
20 305

21  
22 306 **Acknowledgements:** The authors thank Josee Skuce for her help with developing and PRESS  
23  
24 307 reviewing the search strategy, as well as retrieving articles.  
25

26 308 **Funding:** Canadian Blood Services Blood Efficiency and Accelerator Award Program and The  
27  
28 309 Academic Health Science Center Alternative Funding Plan Innovation Fund.  
29

30 310 **Competing interests:** None to declare.  
31

32 311 **Sponsor:** None to declare.  
33  
34  
35  
36  
37  
38  
39  
40  
41  
42  
43  
44  
45  
46  
47  
48  
49  
50  
51  
52  
53  
54  
55  
56  
57  
58  
59  
60

**312 Authors' Contribution**

313 Laura Baker is responsible for aiding in the conception of the work, drafting and revising the  
314 manuscript, approves the submitted version and is accountable for all aspects of the work.

315

316 Lily Park, Richard Gilbert, Andre Martel, Hilalion Ahn, Alexandra Davies, Daniel McIsaac,  
317 Elianna Saidenberg and Alan Tinmouth are responsible for aiding in the conception of the  
318 work, revising the manuscript, approving the final version and are in agreement to being  
319 accountable for all aspects of the work.

320

321 Dean Fergusson and Guillaume Martel are responsible for aiding in the conception of the  
322 work, revising it for important intellectual content, give their approval of the content for  
323 publication and agree to accountability for all aspects of the work. GM is the guarantor of the  
324 protocol.

325

- 326 1. Hendrickson JE, Roubinian NH, Chowdhury D, Brambilla D, Murphy EL, Wu Y, et al. Incidence  
327 of transfusion reactions: a multicenter study utilizing systematic active surveillance and expert  
328 adjudication. *Transfusion*. 2016;56(10):2587-96.
- 329 2. Clinical Guide to Transfusion: Adverse Reactions [Internet]. 2017. Available from:  
330 <https://professionaleducation.blood.ca/en/transfusion/clinical-guide-transfusion>.
- 331 3. Youssef LA, Spitalnik SL. Transfusion-related immunomodulation: a reappraisal. *Curr Opin*  
332 *Hematol*. 2017;24(6):551-7.
- 333 4. Wu HL, Tai YH, Lin SP, Chan MY, Chen HH, Chang KY. The Impact of Blood Transfusion on  
334 Recurrence and Mortality Following Colorectal Cancer Resection: A Propensity Score Analysis of  
335 4,030 Patients. *Sci Rep*. 2018;8(1):13345.
- 336 5. Hallet J, Tsang M, Cheng ES, Habashi R, Kulyk I, Hanna SS, et al. The Impact of Perioperative  
337 Red Blood Cell Transfusions on Long-Term Outcomes after Hepatectomy for Colorectal Liver  
338 Metastases. *Ann Surg Oncol*. 2015;22(12):4038-45.
- 339 6. Xun Y, Tian H, Hu L, Yan P, Yang K, Guo T. The impact of perioperative allogeneic blood  
340 transfusion on prognosis of hepatocellular carcinoma after radical hepatectomy: A systematic review  
341 and meta-analysis of cohort studies. *Medicine (Baltimore)*. 2018;97(43):e12911.
- 342 7. Glance LG, Dick AW, Mukamel DB, Fleming FJ, Zollo RA, Wissler R, et al. Association between  
343 intraoperative blood transfusion and mortality and morbidity in patients undergoing noncardiac  
344 surgery. *Anesthesiology*. 2011;114(2):283-92.
- 345 8. Bernard AC, Davenport DL, Chang PK, Vaughan TB, Zwischenberger JB. Intraoperative  
346 transfusion of 1 U to 2 U packed red blood cells is associated with increased 30-day mortality,  
347 surgical-site infection, pneumonia, and sepsis in general surgery patients. *J Am Coll Surg*.  
348 2009;208(5):931-7, 7 e1-2; discussion 8-9.

*Baker et al. Guidelines on the intraoperative transfusion of red blood cells: a protocol for systematic review*

- 1  
2  
3 349 9. Bennett S, Baker LK, Martel G, Shorr R, Pawlik TM, Tinmouth A, et al. The impact of  
4 350 perioperative red blood cell transfusions in patients undergoing liver resection: a systematic review.  
5 351 HPB (Oxford). 2017;19(4):321-30.
- 6 352 10. Lyu X, Qiao W, Li D, Leng Y. Impact of perioperative blood transfusion on clinical outcomes in  
7 353 patients with colorectal liver metastasis after hepatectomy: a meta-analysis. *Oncotarget*.  
8 354 2017;8(25):41740-8.
- 9 355 11. Shander A, Hofmann A, Gombotz H, Theusinger OM, Spahn DR. Estimating the cost of blood:  
10 356 past, present, and future directions. *Best Pract Res Clin Anaesthesiol*. 2007;21(2):271-89.
- 11 357 12. Stokes EA, Wordsworth S, Staves J, Mundy N, Skelly J, Radford K, et al. Accurate costs of  
12 358 blood transfusion: a microcosting of administering blood products in the United Kingdom National  
13 359 Health Service. *Transfusion*. 2018;58(4):846-53.
- 14 360 13. Amin M, Fergusson D, Wilson K, Tinmouth A, Aziz A, Coyle D, et al. The societal unit cost of  
15 361 allogenic red blood cells and red blood cell transfusion in Canada. *Transfusion*. 2004;44(10):1479-86.
- 16 362 14. Amin M, Fergusson D, Aziz A, Wilson K, Coyle D, Hebert P. The cost of allogeneic red blood  
17 363 cells—a systematic review. *Transfus Med*. 2003;13(5):275-85.
- 18 364 15. Shander A, Hofmann A, Ozawa S, Theusinger OM, Gombotz H, Spahn DR. Activity-based  
19 365 costs of blood transfusions in surgical patients at four hospitals. *Transfusion*. 2010;50(4):753-65.
- 20 366 16. National Blood Inventory 2018 [Available from: <https://blood.ca/en>].
- 21 367 17. Hare GM. Tolerance of anemia: understanding the adaptive physiological mechanisms which  
22 368 promote survival. *Transfus Apher Sci*. 2014;50(1):10-2.
- 23 369 18. Hebert PC, Wells G, Tweeddale M, Martin C, Marshall J, Pham B, et al. Does transfusion  
24 370 practice affect mortality in critically ill patients? Transfusion Requirements in Critical Care (TRICC)  
25 371 Investigators and the Canadian Critical Care Trials Group. *Am J Respir Crit Care Med*.  
26 372 1997;155(5):1618-23.
- 27 373 19. Carson JL, Terrin ML, Noveck H, Sanders DW, Chaitman BR, Rhoads GG, et al. Liberal or  
28 374 restrictive transfusion in high-risk patients after hip surgery. *N Engl J Med*. 2011;365(26):2453-62.
- 29 375 20. Mazer CD, Whitlock RP, Fergusson DA, Belley-Cote E, Connolly K, Khanykin B, et al. Six-  
30 376 Month Outcomes after Restrictive or Liberal Transfusion for Cardiac Surgery. *N Engl J Med*.  
31 377 2018;379(13):1224-33.
- 32 378 21. Carson JL, Grossman BJ, Kleinman S, Tinmouth AT, Marques MB, Fung MK, et al. Red blood  
33 379 cell transfusion: a clinical practice guideline from the AABB\*. *Ann Intern Med*. 2012;157(1):49-58.
- 34 380 22. Wu WC, Smith TS, Henderson WG, Eaton CB, Poses RM, Uttley G, et al. Operative blood loss,  
35 381 blood transfusion, and 30-day mortality in older patients after major noncardiac surgery. *Ann Surg*.  
36 382 2010;252(1):11-7.
- 37 383 23. American Society of Anesthesiologists Task Force on Perioperative Blood T, Adjuvant T. Practice  
38 384 guidelines for perioperative blood transfusion and adjuvant therapies: an updated report by  
39 385 the American Society of Anesthesiologists Task Force on Perioperative Blood Transfusion and  
40 386 Adjuvant Therapies. *Anesthesiology*. 2006;105(1):198-208.
- 41 387 24. Adkins AR, Lee D, Woody DJ, White WA, Jr. Accuracy of blood loss estimations among  
42 388 anesthesia providers. *AANA J*. 2014;82(4):300-6.
- 43 389 25. Barash PG. *Clinical Anesthesia Fundamentals*. Philadelphia: Lippincott Williams & Wilkins;  
44 390 2015.
- 45 391 26. Klein HG, Spahn DR, Carson JL. Red blood cell transfusion in clinical practice. *Lancet*.  
46 392 2007;370(9585):415-26.
- 47 393 27. Bennett S, Tinmouth A, Mclsaac DI, English S, Hebert PC, Karanicolas PJ, et al. Ottawa  
48 394 Criteria for Appropriate Transfusions in Hepatectomy: Using the RAND/UCLA Appropriateness  
49 395 Method. *Ann Surg*. 2018;267(4):766-74.
- 50 396 28. Behrends M, DePalma G, Sands L, Leung J. Association between intraoperative blood  
51 397 transfusions and early postoperative delirium in older adults. *J Am Geriatr Soc*. 2013;61(3):365-70.
- 52 398 29. Choy YC, Lim WL, Ng SH. Audit of perioperative blood transfusion. *Med J Malaysia*.  
53 399 2007;62(4):299-302.

- 1  
2  
3 400 30. Spencer J, Thomas SR, Yardy G, Mukundan C, Barrington R. Are we overusing blood  
4 401 transfusing after elective joint replacement?--a simple method to reduce the use of a scarce  
5 402 resource. *Ann R Coll Surg Engl*. 2005;87(1):28-30.
- 6 403 31. Niraj G, Puri GD, Arun D, Chakravarty V, Aveek J, Chari P. Assessment of intraoperative blood  
7 404 transfusion practice during elective non-cardiac surgery in an Indian tertiary care hospital. *Br J*  
8 405 *Anaesth*. 2003;91(4):586-9.
- 9 406 32. Mallett SV, Peachey TD, Sanehi O, Hazlehurst G, Mehta A. Reducing red blood cell  
10 407 transfusion in elective surgical patients: the role of audit and practice guidelines. *Anaesthesia*.  
11 408 2000;55(10):1013-9.
- 12 409 33. Hallissey MT, Crowson MC, Kiff RS, Kingston RD, Fielding JW. Blood transfusion: an overused  
13 410 resource in colorectal cancer surgery. *Ann R Coll Surg Engl*. 1992;74(1):59-62.
- 14 411 34. Bennett S, Ayoub A, Tran A, English S, Tinmouth A, McIsaac DI, et al. Current practices in  
15 412 perioperative blood management for patients undergoing liver resection: a survey of surgeons and  
16 413 anesthesiologists. *Transfusion*. 2018;58(3):781-7.
- 17 414 35. Meier J, Filipescu D, Kozek-Langenecker S, Llau Pitarch J, Mallett S, Martus P, et al.  
18 415 Intraoperative transfusion practices in Europe. *Br J Anaesth*. 2016;116(2):255-61.
- 19 416 36. Carson JL, Guyatt G, Heddle NM, Grossman BJ, Cohn CS, Fung MK, et al. Clinical Practice  
20 417 Guidelines From the AABB: Red Blood Cell Transfusion Thresholds and Storage. *JAMA*.  
21 418 2016;316(19):2025-35.
- 22 419 37. Pavenski K, Stanworth S, Fung M, Wood EM, Pink J, Murphy MF, et al. Quality of Evidence-  
23 420 Based Guidelines for Transfusion of Red Blood Cells and Plasma: A Systematic Review. *Transfus Med*  
24 421 *Rev*. 2018.
- 25 422 38. Kozek-Langenecker SA, Afshari A, Albaladejo P, Santullano CA, De Robertis E, Filipescu DC, et  
26 423 al. Management of severe perioperative bleeding: guidelines from the European Society of  
27 424 Anaesthesiology. *Eur J Anaesthesiol*. 2013;30(6):270-382.
- 28 425 39. Practice Guidelines for blood component therapy: A report by the American Society of  
29 426 Anesthesiologists Task Force on Blood Component Therapy. *Anesthesiology*. 1996;84(3):732-47.
- 30 427 40. Klein AA, Arnold P, Bingham RM, Brohi K, Clark R, Collis R, et al. AAGBI guidelines: the use of  
31 428 blood components and their alternatives 2016. *Anaesthesia*. 2016;71(7):829-42.
- 32 429 41. Moll FL, Powell JT, Fraedrich G, Verzini F, Haulon S, Waltham M, et al. Management of  
33 430 abdominal aortic aneurysms clinical practice guidelines of the European society for vascular surgery.  
34 431 *Eur J Vasc Endovasc Surg*. 2011;41 Suppl 1:S1-S58.
- 35 432 42. Liberati A, Altman DG, Tetzlaff J, Mulrow C, Gotzsche PC, Ioannidis JP, et al. The PRISMA  
36 433 statement for reporting systematic reviews and meta-analyses of studies that evaluate health care  
37 434 interventions: explanation and elaboration. *PLoS Med*. 2009;6(7):e1000100.
- 38 435 43. Moher D, Shamseer L, Clarke M, Ghersi D, Liberati A, Petticrew M, et al. Preferred reporting  
39 436 items for systematic review and meta-analysis protocols (PRISMA-P) 2015 statement. *Syst Rev*.  
40 437 2015;4:1.
- 41 438 44. Clinical Practice Guidelines we can trust [press release]. The National Academies Press 2011.
- 42 439 45. Rozanski A, Slomka P, D SB. Extending the Use of Coronary Calcium Scanning to Clinical  
43 440 Rather Than Just Screening Populations: Ready for Prime Time? *Circ Cardiovasc Imaging*. 2016;9(5).
- 44 441 46. Guidelines International Network [Available from: [www.g-i-n.net](http://www.g-i-n.net)].
- 45 442 47. National Institute for Health for Health and Care Excellence (NICE).
- 46 443 48. National Health Service (NHS) Evidence.
- 47 444 49. Canadian Medical Association Infobase.
- 48 445 50. New Zealand Guidelines Group.
- 49 446 51. World Health Organization.
- 50 447 52. Ulrich-Vinther M, Carmody EE, Goater JJ, K Sb, O'Keefe RJ, Schwarz EM. Recombinant adeno-  
51 448 associated virus-mediated osteoprotegerin gene therapy inhibits wear debris-induced osteolysis. *J*  
52 449 *Bone Joint Surg Am*. 2002;84-A(8):1405-12.

*Baker et al. Guidelines on the intraoperative transfusion of red blood cells: a protocol for systematic review*

- 1  
2  
3 450 53. Balk EM, Chung M, Chen ML, Trikalinos TA, Kong Win Chang L. Assessing the Accuracy of  
4 451 Google Translate to Allow Data Extraction From Trials Published in Non-English Languages. AHRQ  
5 452 Methods for Effective Health Care. Rockville (MD)2013.  
6 453 54. Brouwers MC, Kho ME, Browman GP, Burgers JS, Cluzeau F, Feder G, et al. AGREE II:  
7 454 advancing guideline development, reporting, and evaluation in health care. *Prev Med*.  
8 455 2010;51(5):421-4.  
9 456 55. Brouwers MC, Kho ME, Browman GP, Burgers JS, Cluzeau F, Feder G, et al. Development of  
10 457 the AGREE II, part 1: performance, usefulness and areas for improvement. *CMAJ*.  
11 458 2010;182(10):1045-52.  
12 459 56. Brouwers MC, Kho ME, Browman GP, Burgers JS, Cluzeau F, Feder G, et al. Development of  
13 460 the AGREE II, part 2: assessment of validity of items and tools to support application. *CMAJ*.  
14 461 2010;182(10):E472-8.  
15 462 57. Guyatt GH, Oxman AD, Vist GE, Kunz R, Falck-Ytter Y, Alonso-Coello P, et al. GRADE: an  
16 463 emerging consensus on rating quality of evidence and strength of recommendations. *BMJ*.  
17 464 2008;336(7650):924-6.  
18 465 58. Canadian Blood Services Centre for Innovation Intramural Research Grant Program  
19 466 Guidelines 2018 [Available from:  
20 467 [https://blood.ca/sites/default/files/Intramural\\_Research\\_Grant\\_Program\\_Guidelines\\_1.pdf](https://blood.ca/sites/default/files/Intramural_Research_Grant_Program_Guidelines_1.pdf).  
21 468 59. Sudhindran S. Perioperative blood transfusion: a plea for guidelines. *Ann R Coll Surg Engl*.  
22 469 1997;79(4):299-302.  
23 470 60. Boet S, Etherington N, Nicola D, Beck A, Bragg S, Carrigan ID, et al. Anesthesia interventions  
24 471 that alter perioperative mortality: a scoping review. *Syst Rev*. 2018;7(1):218.  
25  
26  
27  
28  
29

30 473 Figure 1: Flow diagram of study selection process.  
31  
32  
33  
34  
35  
36  
37  
38  
39  
40  
41  
42  
43  
44  
45  
46  
47  
48  
49  
50  
51  
52  
53  
54  
55  
56  
57  
58  
59  
60

1  
2  
3  
4  
5  
6  
7  
8  
9  
10  
11  
12  
13  
14  
15  
16  
17  
18  
19  
20  
21  
22  
23  
24  
25  
26  
27  
28  
29  
30  
31  
32  
33  
34  
35  
36  
37  
38  
39  
40  
41  
42  
43  
44  
45  
46  
47  
48  
49  
50  
51  
52  
53  
54  
55  
56  
57  
58  
59  
60

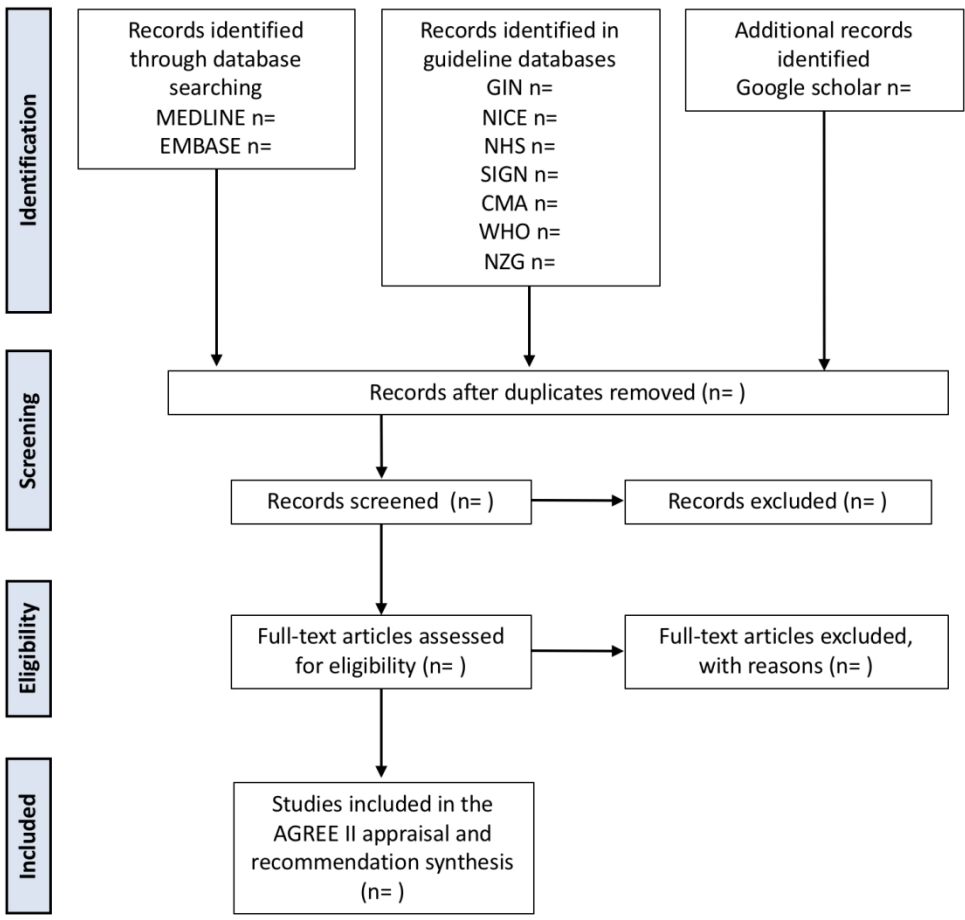

Figure 1: Flow diagram of study selection process.



## Appendix I: Search Strategy

Database: Ovid MEDLINE(R) ALL <1946 to January 21, 2019>

Search Strategy:

-----

1 \*blood transfusion/ or blood component transfusion/ or erythrocyte transfusion/ (36153)  
 2 ((red blood cell\$ or rbc or erythrocyte\$ or red cell\$) adj3 (transfus\$ or infus\* or retransfus\*)).tw. (10506)  
 3 (blood adj4 transfus\*).tw. (54555) - I expanded this  
 4 RBCT.tw,kw. (95)  
 5 (RBC transfusion or red blood cell transfusion).kw. (110)  
 6 (hemotransfus\$ or haemotransfus\$).tw,kw. (234)  
 7 or/1-6 (78107)  
 8 INTRAOPERATIVE COMPLICATIONS/ or INTRAOPERATIVE CARE/ or INTRAOPERATIVE PERIOD/  
 9 or Perioperative Care/ (69769)  
 10 (intraoperat\* or intra-operat\* or perioperat\* or peri-operat\*).tw,kw. (205937)  
 11 (surg\* or operat\*).ti. (708792) - added this line  
 12 (transfus\* adj5 (operat\* or surg\*)).tw. (8642)  
 13 ((undergoing or during) adj4 (surg\* or operat\*)).tw. (180983) - expanded this line by taking out  
 14 'transfus\*  
 15 or/8-12 (968870)  
 16 7 and 13 (18339)  
 17 exp clinical pathway/ (6046)  
 18 clinical protocol/ (25911)  
 19 exp consensus/ (9313)  
 20 exp consensus development conference/ (11078)  
 21 exp consensus development conferences as topic/ (2618)  
 22 guidelines as topic/ (37008)  
 23 exp practice guideline/ (24266)  
 24 practice guidelines as topic/ (105996)  
 25 health planning guidelines/ (4007)  
 26 (guideline or practice guideline or consensus development conference or consensus development  
 27 conference, NIH).pt. (39641)  
 28 (standards or guideline or guidelines).ti,kf,kw. (96689)  
 29 ((practice or treatment\* or clinical) adj guideline\*).ab. (33765)  
 30 (CPG or CPGs).ti. (5320)  
 31 consensus\*.ti,kf,kw. (22038)  
 32 ((critical or clinical or practice) adj2 (path or paths or pathway or pathways or protocol\*)).ti,ab,kf,kw.  
 33 (17432)  
 34 recommendat\*.ti,kf,kw. (35650)  
 35 or/15-30 (334141)  
 36 14 and 31 (550)  
 37 (rbc transfusion\* or red blood cell\* transfusion\*).ti. (1054)  
 38 (transfus\* and (intraoperat\* or intra-operat\* or perioperat\* or peri-operat\*)).ti. (1014)  
 39 33 or 34 (1999)  
 40 (guideline or practice guideline or consensus development conference or consensus development  
 41 conference, NIH).pt. (39641)  
 42 (standards or guideline or guidelines).ti,kf,kw. (96689)  
 43 36 or 37 (122196)  
 44 35 and 38 (61)  
 45 32 or 39 (578)  
 46 animals/ not humans/ (4465996)  
 47 40 not 41 (577)  
 48 (exp infants/ or child/) not adult/ (1517431)  
 49 42 not 43 (546)

## PRISMA-P 2015 Checklist

This checklist has been adapted for use with protocol submissions to *Systematic Reviews* from Table 3 in Moher D et al: Preferred reporting items for systematic review and meta-analysis protocols (PRISMA-P) 2015 statement. *Systematic Reviews* 2015 4:1

| Section/topic                     | #  | Checklist item                                                                                                                                                                                  | Information reported     |                          | Line number(s) |
|-----------------------------------|----|-------------------------------------------------------------------------------------------------------------------------------------------------------------------------------------------------|--------------------------|--------------------------|----------------|
|                                   |    |                                                                                                                                                                                                 | Yes                      | No                       |                |
| <b>ADMINISTRATIVE INFORMATION</b> |    |                                                                                                                                                                                                 |                          |                          |                |
| <b>Title</b>                      |    |                                                                                                                                                                                                 |                          |                          |                |
| Identification                    | 1a | Identify the report as a protocol of a systematic review                                                                                                                                        | x                        | <input type="checkbox"/> | 1-2            |
| Update                            | 1b | If the protocol is for an update of a previous systematic review, identify as such                                                                                                              | <input type="checkbox"/> | x                        | N/A            |
| <b>Registration</b>               | 2  | If registered, provide the name of the registry (e.g., PROSPERO) and registration number in the Abstract                                                                                        | x                        | <input type="checkbox"/> | 49             |
| <b>Authors</b>                    |    |                                                                                                                                                                                                 |                          |                          |                |
| Contact                           | 3a | Provide name, institutional affiliation, and e-mail address of all protocol authors; provide physical mailing address of corresponding author                                                   | x                        | <input type="checkbox"/> | 4-33           |
| Contributions                     | 3b | Describe contributions of protocol authors and identify the guarantor of the review                                                                                                             | x                        | <input type="checkbox"/> | 312-323        |
| <b>Amendments</b>                 | 4  | If the protocol represents an amendment of a previously completed or published protocol, identify as such and list changes; otherwise, state plan for documenting important protocol amendments | x                        | <input type="checkbox"/> | 155-156        |
| <b>Support</b>                    |    |                                                                                                                                                                                                 |                          |                          |                |
| Sources                           | 5a | Indicate sources of financial or other support for the review                                                                                                                                   | x                        | <input type="checkbox"/> | 308-309        |
| Sponsor                           | 5b | Provide name for the review funder and/or sponsor                                                                                                                                               | x                        | <input type="checkbox"/> | 311            |
| Role of sponsor/funder            | 5c | Describe roles of funder(s), sponsor(s), and/or institution(s), if any, in developing the protocol                                                                                              | <input type="checkbox"/> | x                        | N/A            |
| <b>INTRODUCTION</b>               |    |                                                                                                                                                                                                 |                          |                          |                |
| <b>Rationale</b>                  | 6  | Describe the rationale for the review in the context of what is already known                                                                                                                   | x                        | <input type="checkbox"/> | 61-141         |
| <b>Objectives</b>                 | 7  | Provide an explicit statement of the question(s) the review will address with reference to participants, interventions, comparators, and outcomes (PICO)                                        | x                        | <input type="checkbox"/> | 143-147        |

| Section/topic                             | #   | Checklist item                                                                                                                                                                                                                              | Information reported     |                          | Line number(s) |
|-------------------------------------------|-----|---------------------------------------------------------------------------------------------------------------------------------------------------------------------------------------------------------------------------------------------|--------------------------|--------------------------|----------------|
|                                           |     |                                                                                                                                                                                                                                             | Yes                      | No                       |                |
| <b>METHODS</b>                            |     |                                                                                                                                                                                                                                             |                          |                          |                |
| <b>Eligibility criteria</b>               | 8   | Specify the study characteristics (e.g., PICO, study design, setting, time frame) and report characteristics (e.g., years considered, language, publication status) to be used as criteria for eligibility for the review                   | x                        | <input type="checkbox"/> | 157-172        |
| <b>Information sources</b>                | 9   | Describe all intended information sources (e.g., electronic databases, contact with study authors, trial registers, or other grey literature sources) with planned dates of coverage                                                        | x                        | <input type="checkbox"/> | 173-187        |
| <b>Search strategy</b>                    | 10  | Present draft of search strategy to be used for at least one electronic database, including planned limits, such that it could be repeated                                                                                                  | x                        | <input type="checkbox"/> | Appendix 1     |
| <b>STUDY RECORDS</b>                      |     |                                                                                                                                                                                                                                             |                          |                          |                |
| Data management                           | 11a | Describe the mechanism(s) that will be used to manage records and data throughout the review                                                                                                                                                | x                        | <input type="checkbox"/> | 189-190        |
| Selection process                         | 11b | State the process that will be used for selecting studies (e.g., two independent reviewers) through each phase of the review (i.e., screening, eligibility, and inclusion in meta-analysis)                                                 | x                        | <input type="checkbox"/> | 190-193        |
| Data collection process                   | 11c | Describe planned method of extracting data from reports (e.g., piloting forms, done independently, in duplicate), any processes for obtaining and confirming data from investigators                                                        | x                        | <input type="checkbox"/> | 199-211        |
| <b>Data items</b>                         | 12  | List and define all variables for which data will be sought (e.g., PICO items, funding sources), any pre-planned data assumptions and simplifications                                                                                       | x                        | <input type="checkbox"/> | 199-211        |
| <b>Outcomes and prioritization</b>        | 13  | List and define all outcomes for which data will be sought, including prioritization of main and additional outcomes, with rationale                                                                                                        | x                        | <input type="checkbox"/> | 212-215        |
| <b>Risk of bias in individual studies</b> | 14  | Describe anticipated methods for assessing risk of bias of individual studies, including whether this will be done at the outcome or study level, or both; state how this information will be used in data synthesis                        | x                        | <input type="checkbox"/> | 219-241        |
| <b>DATA</b>                               |     |                                                                                                                                                                                                                                             |                          |                          |                |
| <b>Synthesis</b>                          | 15a | Describe criteria under which study data will be quantitatively synthesized                                                                                                                                                                 | x                        | <input type="checkbox"/> | 219            |
|                                           | 15b | If data are appropriate for quantitative synthesis, describe planned summary measures, methods of handling data, and methods of combining data from studies, including any planned exploration of consistency (e.g., $I^2$ , Kendall's tau) | <input type="checkbox"/> | x                        | N/A            |
|                                           | 15c | Describe any proposed additional analyses (e.g., sensitivity or subgroup analyses, meta-regression)                                                                                                                                         | x                        | <input type="checkbox"/> | 246-251        |
|                                           | 15d | If quantitative synthesis is not appropriate, describe the type of summary planned                                                                                                                                                          | x                        | <input type="checkbox"/> | 242-245        |

1  
2  
3  
4  
5  
6  
7  
8  
9  
10  
11  
12  
13  
14  
15  
16  
17  
18  
19  
20  
21  
22  
23  
24  
25  
26  
27  
28  
29  
30  
31  
32  
33  
34  
35  
36  
37  
38  
39  
40  
41  
42  
43  
44  
45  
46

| Section/topic                     | #  | Checklist item                                                                                                              | Information reported     |    | Line number(s) |
|-----------------------------------|----|-----------------------------------------------------------------------------------------------------------------------------|--------------------------|----|----------------|
|                                   |    |                                                                                                                             | Yes                      | No |                |
| Meta-bias(es)                     | 16 | Specify any planned assessment of meta-bias(es) (e.g., publication bias across studies, selective reporting within studies) | <input type="checkbox"/> | x  | N/A            |
| Confidence in cumulative evidence | 17 | Describe how the strength of the body of evidence will be assessed (e.g., GRADE)                                            | <input type="checkbox"/> | x  | N/A            |

For peer review only

# BMJ Open

## Guidelines on the intraoperative transfusion of red blood cells: a protocol for systematic review

|                                 |                                                                                                                                                                                                                                                                                                                                                                                                                                                                                                                                                                                                                                                                                                                                                                                                                                                                                                       |
|---------------------------------|-------------------------------------------------------------------------------------------------------------------------------------------------------------------------------------------------------------------------------------------------------------------------------------------------------------------------------------------------------------------------------------------------------------------------------------------------------------------------------------------------------------------------------------------------------------------------------------------------------------------------------------------------------------------------------------------------------------------------------------------------------------------------------------------------------------------------------------------------------------------------------------------------------|
| Journal:                        | <i>BMJ Open</i>                                                                                                                                                                                                                                                                                                                                                                                                                                                                                                                                                                                                                                                                                                                                                                                                                                                                                       |
| Manuscript ID                   | bmjopen-2019-029684.R2                                                                                                                                                                                                                                                                                                                                                                                                                                                                                                                                                                                                                                                                                                                                                                                                                                                                                |
| Article Type:                   | Protocol                                                                                                                                                                                                                                                                                                                                                                                                                                                                                                                                                                                                                                                                                                                                                                                                                                                                                              |
| Date Submitted by the Author:   | 22-Mar-2019                                                                                                                                                                                                                                                                                                                                                                                                                                                                                                                                                                                                                                                                                                                                                                                                                                                                                           |
| Complete List of Authors:       | Baker, Laura; The Ottawa Hospital, General Surgery; Ottawa Hospital Research Institute<br>Park, Lily; The Ottawa Hospital, General Surgery<br>Gilbert, Richard; The Ottawa Hospital, General Surgery<br>Martel, Andre; The Ottawa Hospital, General Surgery<br>Ahn, Hilalion; The Ottawa Hospital, General Surgery<br>Davis, Alexandra; Ottawa Hospital Research Institute<br>McIsaac, Daniel; The Ottawa Hospital, Anesthesiology and Pain Medicine<br>Saidenberg, Elianna; Ottawa Hospital, Pathology and Lab Medicine; The Ottawa Hospital<br>Tinmouth, Alan ; The Ottawa Hospital, Division of Hematology, Department of Medicine; Ottawa Hospital Research Institute, Medicine<br>Fergusson, Dean; Ottawa Hospital Research Institute, Medicine<br>Martel, Guillaume; Ottawa Hospital, Liver and Pancreas Unit, Department of Surgery; Ottawa Hospital Research Institute, Clinical Epidemiology |
| <b>Primary Subject Heading</b>: | Surgery                                                                                                                                                                                                                                                                                                                                                                                                                                                                                                                                                                                                                                                                                                                                                                                                                                                                                               |
| Secondary Subject Heading:      | Anaesthesia, Evidence based practice                                                                                                                                                                                                                                                                                                                                                                                                                                                                                                                                                                                                                                                                                                                                                                                                                                                                  |
| Keywords:                       | Protocols & guidelines < HEALTH SERVICES ADMINISTRATION & MANAGEMENT, SURGERY, Blood bank & transfusion medicine < HAEMATOLOGY, Adult anaesthesia < ANAESTHETICS, Paediatric anaesthesia < ANAESTHETICS                                                                                                                                                                                                                                                                                                                                                                                                                                                                                                                                                                                                                                                                                               |
|                                 |                                                                                                                                                                                                                                                                                                                                                                                                                                                                                                                                                                                                                                                                                                                                                                                                                                                                                                       |

SCHOLARONE™  
Manuscripts

*Baker et al. Guidelines on the intraoperative transfusion of red blood cells: a protocol for systematic review*

**Guidelines on the intraoperative transfusion of red blood cells: a protocol for systematic review**

Laura Baker<sup>1,2,3,4</sup>, Lily Park<sup>4</sup>, Richard Gilbert<sup>1,4</sup>, Andre Martel<sup>1,4</sup>, Hilalion Ahn<sup>4</sup>, Alexandra Davies<sup>5</sup>, Daniel McIsaac<sup>2,3,6</sup>, Elianna Saidenberg<sup>2,7</sup>, Alan Tinmouth<sup>2,3,7</sup>, Dean Fergusson<sup>2,3</sup>, Guillaume Martel<sup>1,2,3</sup>

Liver and Pancreas Unit, Department of Surgery, The Ottawa Hospital<sup>1</sup>

Ottawa Hospital Research Institute<sup>2</sup>

School of Epidemiology and Public Health, Faculty of Medicine, The University of Ottawa<sup>3</sup>

Faculty of Medicine, The University of Ottawa<sup>4</sup>

Learning Services, The Ottawa Hospital<sup>5</sup>

Departments of Anesthesiology & Pain Medicine, University of Ottawa and The Ottawa Hospital<sup>6</sup>

Division of Hematology, Department of Medicine, The Ottawa Hospital<sup>7</sup>

**Corresponding author:**

Guillaume Martel, MD, MSc, FRCSC, FACS

501 Smyth Road, CCW 1667

Ottawa, ON K1H 8L6

gumartel@toh.ca

Tel.: +1-613-737-8899, ext. 71053

**Additional authors:**

Laura Baker laurbaker@toh.ca

Lily Park lpark016@uottawa.ca

Richard Gilbert rigilbert@toh.ca

Andre Martel anmartel@toh.ca

Hilalion San hahn066@uottawa.ca

*Baker et al. Guidelines on the intraoperative transfusion of red blood cells: a protocol for systematic review*

28  
29 Daniel McIsaac [dmcisaac@toh.ca](mailto:dmcisaac@toh.ca)  
30  
31 Elianna Saidenberg [esaidenberg@toh.ca](mailto:esaidenberg@toh.ca)  
32 Alan Tinmouth [atinmouth@toh.ca](mailto:atinmouth@toh.ca)  
33 Dean Fergusson [dafergusson@ohri.ca](mailto:dafergusson@ohri.ca)

## **ABSTRACT**

**Introduction** A significant proportion of red blood cell transfusions are administered intraoperatively; yet there is limited evidence to guide transfusion decisions in this setting. The objective of this systematic review is to explore the availability, quality and content of clinical practice guidelines (CPG) reporting on the indication for allogenic RBC transfusion during surgery.

**Methods** Major electronic databases (MEDLINE, EMBASE and CINAHL), guideline clearinghouses and Google Scholar, will be systematically searched from inception to January 2019 for CPGs pertaining to indications for intraoperative allogenic RBC transfusion. Characteristics of eligible guidelines will be reported in a summary table. The AGREE II instrument will be used to appraise the quality of identified guidelines. Recommendations advising on indications for intraoperative RBC transfusion will be manually extracted and presented to allow for comparison of similarities and/or discrepancies in the literature. .

**Ethics and dissemination** The results of this systematic review will be disseminated through relevant conferences and peer-reviewed journals.

**Protocol registration number** PROSPERO CRD42018111487

### **Strengths and limitations of this study:**

- The proposed study is the first systematic review to identify the availability of practice guidelines advising on intraoperative red blood cell transfusion
- A multidisciplinary group of methodologic and content experts are involved in this review
- The search strategy will be PRESS reviewed
- Guidelines in all languages will be considered for inclusion

*Baker et al. Guidelines on the intraoperative transfusion of red blood cells: a protocol for systematic review*

- 1  
2  
3 57 • The Appraisal of Guidelines for Research and Evaluation II (AGREE II) instrument, an  
4  
5 58 internationally validated tool, will be utilized to assess the quality of guidelines by four  
6  
7 59 independent reviewers  
8  
9  
10 60

11 **INTRODUCTION**  
12

13 62 Red blood cell (RBC) transfusions although potentially lifesaving, are a costly and limited  
14 63 resource, associated with possible harm. Potential adverse outcomes range in severity, from minor  
15 64 to life-threatening. Relatively mild reactions include febrile non-hemolytic transfusion reactions,  
16 65 minor allergic reactions, or development of RBC alloantibodies. RBC alloantibodies can usually be  
17 66 managed with the provision of antigen negative products (1)(2). However, in the case of rare  
18 67 antibodies, development of alloantibodies can complicate administration of future blood products  
19 68 (1). Life-threatening transfusion reactions include anaphylaxis, transfusion related acute lung injury,  
20 69 bacterial contamination of blood products resulting in sepsis, acute hemolytic transfusion reactions,  
21 70 and transfusion associated circulatory overload (1)(2). While the risk of transfusion transmitted viral  
22 71 infections has dropped drastically in recent years and the risk of this occurring is extremely low, it  
23 72 remains a concern when deciding to transfuse patients (2). RBC transfusions may also cause  
24 73 immunosuppression in the recipient, a process called “transfusion-related immunomodulation  
25 74 (TRIM) (3). TRIM provides rationale for the negative association observed between RBC transfusion  
26 75 and post-operative adverse events as well as cancer recurrence in patients undergoing oncology  
27 76 surgery (4) (5) (6) (7) (8) (9) (10). At an estimated price tag of 102-761 USD per unit, RBC  
28 77 transfusions are costly (11) (12) (13) (14). They are also in short supply, relying on altruistic blood  
29 78 donors to ensure inventory stability (15) (16). Given their associated risk, expense and scarcity, it is  
30 79 critical they are administered wisely.  
31  
32  
33  
34  
35  
36  
37  
38  
39  
40  
41  
42  
43  
44  
45  
46  
47  
48  
49  
50

51 80 There has been significant evolution in our understanding of humans’ ability to tolerate  
52 81 anemia; resulting in a shift in approach to RBC transfusion prescribing practices from the “10/30”  
53 82 rule (i.e. transfusion indicated below a hemoglobin of 10g/L or hematocrit <30%) to the widely  
54 83 accepted transfusion trigger of 70g/L in the asymptomatic patient without significant cardiac  
55  
56  
57  
58  
59  
60



*Baker et al. Guidelines on the intraoperative transfusion of red blood cells: a protocol for systematic review*

84 comorbidity. This change came into effect following reporting of the TRICC trial and others that have  
85 shown the safety of a restrictive transfusion threshold (17, 18) (19) (20). Importantly, the findings of  
86 these studies, which have impacted transfusion practices across a broad spectrum of clinical  
87 scenarios, are not necessarily applicable in the operative setting.

88 The operative setting presents a unique situation in which the indications for transfusion  
89 commonly reported in the non-operative patient have limited transferability. As blood loss, and  
90 consequently hemoglobin concentration can be unpredictable during surgery, hemoglobin  
91 concentrations may drop suddenly, making previous measurements of hemoglobin concentration  
92 invalid. This limits the feasibility of utilizing specific hemoglobin levels to guide RBC transfusion  
93 administration in surgical patients (21). There is some literature to suggest estimated surgical blood  
94 loss can be utilized to guide transfusion decisions (22) (23). However, there is good evidence to  
95 support the inability of clinicians to accurately predict blood loss (24). It is also important to  
96 appreciate that not all intraoperative bleeding is the same, varying from a persistent, slow ooze, to  
97 massive, rapid blood loss from a major vessel. Additionally, reliance on hemodynamics is complex  
98 as in addition to blood loss, it is a reflection of multiple variables, including but not limited to:  
99 anesthetic agents, patient positioning, presence of pneumoperitoneum and neurologic stimulation  
100 (25). In the non-operative setting, acute blood loss of approximately 20% results in a compensatory  
101 tachycardia (26). However, because of the other variables at play in the anesthetized patient,  
102 tachycardia is not a reliable marker of blood loss. Another common recommendation is to monitor  
103 for the presence of inadequate perfusion and oxygenation of vital organs (23). The ability to monitor  
104 for symptoms of decreased end-organ perfusion such as decreased level of consciousness, chest  
105 pain, or abdominal pain, are not possible in the unconscious patient under general anesthesia.  
106 Incorporation of decision rules specific to surgical patient, such as monitoring for ST changes, are  
107 fundamental to guiding appropriate RBC transfusion for a patient under general anesthesia for  
108 surgery(27). Another aspect unique to the unconscious patient under general anesthesia, subject to  
109 dynamic changes in hemodynamics for a number of reasons, is our limited ability to identify  
110 transfusion reactions. Although literature in this area is lacking, it would be reasonable to

*Baker et al. Guidelines on the intraoperative transfusion of red blood cells: a protocol for systematic review*

111 hypothesize that transfusion reactions in the intra-operative setting are underreported. This, in  
112 combination with the evidence that patients who receive intraoperative transfusions suffer increased  
113 short and long term morbidity, advocates for careful consideration of transfusion administration (28)  
114 (7).

115 The uncertainty of transfusion indications in this patient population is demonstrated by the  
116 abundance of literature reporting on the wide variability in transfusion practices but largely reporting  
117 over-transfusion of surgical patients (29) (30) (31) (32) (33). A recent survey of Canadian liver  
118 surgeons and anesthesiologists highlights the lack of consensus between practitioners regarding  
119 indications for transfusion. In response to the question “what is the most important information you  
120 use to decide on intraoperative transfusion,” the majority of anesthesiologist selected hemoglobin  
121 value (47.2% vs 19% of surgeons;  $p < 0.05$ ), whereas surgeons selected hemodynamics (33.4% vs  
122 14% of anesthesiologist;  $p > 0.05$ ) (34). A prospective observational study of intraoperative  
123 transfusion practices in Europe reported “physiologic trigger irrespective of hemoglobin” as the most  
124 common indication for transfusion in a cohort of 5803 patients (35). Despite a global shift to a more  
125 restrictive transfusion strategy, wide variability in practice patterns in the intraoperative setting exists,  
126 and therefore warrants a review of the recommendations.

127 A preliminary search reveals guidance pertaining to RBC transfusion in the intraoperative  
128 patient population is lacking. Recently published guidelines from AABB, a worldwide leader in  
129 producing clinical practice guidelines for utilization of blood components, neglected to provide  
130 recommendations on indications for RBC transfusion in the intraoperative setting likely due to a lack  
131 of evidence on which to base recommendations (36). Guidelines endorsed by surgical and  
132 anesthesia societies offer vague recommendations with limited directives for when to transfuse, for  
133 example, to monitor for blood loss, check hemoglobin or hematocrit prior to transfusion, adopt a  
134 restrictive transfusion strategy or assess for adequate perfusion and oxygenation (37) (38) (39) (40)  
135 (41). As alluded to previously, reliance on these variables is limited in the intraoperative period. A  
136 formal review of the literature to understand available guidance for intraoperative RBC decisions is  
137 necessary.

*Baker et al. Guidelines on the intraoperative transfusion of red blood cells: a protocol for systematic review*

1  
2  
3 138 In summary, blood transfusions are associated with possible harm and over-transfusion in  
4  
5 139 the intraoperative setting is common. Although there is an abundance of guidance pertaining to  
6  
7 140 indications for RBC transfusion, a review of guidance dedicated to the intraoperative patient does  
8  
9 141 not currently exist.

10  
11 142

12  
13 143 **OBJECTIVE**

14  
15 144 The objective of this systematic review is to explore the availability, quality and consistency  
16  
17 145 of published guidelines reporting on the indication for allogenic red blood cell transfusion in the  
18  
19 146 intraoperative setting. We also aim to summarize the existing recommendations and associated  
20  
21 147 level of evidence.

22  
23 148

24  
25 149 **METHODS**

26  
27 150 The Preferred Reporting Items for Systematic Review and Meta-analysis Protocols  
28  
29 151 (PRISMA-P) checklist guidelines were referenced for development of this protocol (42) (43). A  
30  
31 152 PRISMA-P checklist is available as a supplementary document. The protocol was registered with  
32  
33 153 the PROSPERO International Prospective Register of Systematic Reviews on October 16, 2018  
34  
35 154 (CRD42018111487).

36  
37 155 Any amendments made to the current protocol will be published using a protocol addendum,  
38  
39 156 accompanied by the date of and rationale for the reported amendment, with the final manuscript.

40  
41 157 ***Eligibility criteria:***

42  
43 158 Guidelines reporting on indications for allogenic red blood cell transfusion in the  
44  
45 159 intraoperative setting will be considered for inclusion. Our definition of clinical practice guidelines is  
46  
47 160 adopted from the Institute of Medicine and National Guideline Clearinghouse which define them as  
48  
49 161 recommendations, derived from systematic review of evidence, from collective opinions of an expert  
50  
51 162 panel, aimed at health care providers intended to improve patient care (44, 45). An article will be  
52  
53 163 included if it: (1) is presented as a clinical practice guideline; (2) is based on a systematic review of  
54  
55 164 evidence; (3) is produced by a medical association, professional society, public or private

*Baker et al. Guidelines on the intraoperative transfusion of red blood cells: a protocol for systematic review*

165 organization or government agency and not by an individual(s) not sponsored or supported by the  
166 above groups; (4) includes recommendations for indications for allogenic red blood cell transfusion  
167 in patients undergoing general anesthesia in an operating room; (5) in any language; (6) full-text  
168 available.

169 We plan on excluding: (1) documents that do not meet the definition of a guideline as stated  
170 above; (2) guidelines pertaining to the perioperative period that do not make specific  
171 recommendations on the intraoperative setting (3) previous documents replaced by updated  
172 versions from the same organization.

**173 Information sources and search strategy**

174 MEDLINE (OVID interface, including In-Process and Epub Ahead of Print) and EMBASE  
175 (OVID interface) and CINHAL will be systematically searched from inception to January 2019,  
176 through application of a search strategy developed by a health science librarian with expertise in  
177 systematic reviews. Search terms will include 'allogenic red blood cell transfusion', 'guideline' and  
178 'operative'. The search will not be restricted by date, language or patient population (ie. adult versus  
179 pediatric). A Peer Review of Electronic Search Strategies (PRESS) will be performed by a second  
180 information specialist who is not associated with the project. A draft search strategy for Medline  
181 can be found in Appendix 1. The following guideline-specific databases will also be searched:  
182 National Institute for Health and Care Excellence (NICE) (UK), the Canadian Medical Association  
183 Infobase (Canada), the G-I-N International Guideline Library, the New Zealand Guidelines (NZG)  
184 Group, The World Health Organization and the Scottish Intercollegiate Guidelines Network (SIGN)  
185 (46-51). Google Scholar will be searched with '(intraoperative OR perioperative) AND (guideline  
186 OR consensus OR recommendation OR statement)' and the first 200 records will be screened.  
187 References of identified articles will be reviewed for relevant guidelines.

**188 Study Records**

189 Articles identified through the electronic databases (MEDLINE and EMBASE) will be  
190 imported into Covidence, an online citation manager (52). All titles and abstracts identified will be  
191 independently screened by two reviewers for relevance and categorized as relevant, possibly

*Baker et al. Guidelines on the intraoperative transfusion of red blood cells: a protocol for systematic review*

192 relevant, or irrelevant. Articles categorized as relevant or possibly relevant will be retrieved for further  
193 evaluation. Full texts will also reviewed in duplicate for eligibility. Google translate will be used to  
194 translate non-English, non-French articles, with the exception of those written in Chinese (53). Any  
195 disagreement regarding relevancy will be resolved by a senior author, independent from the  
196 reviewers. Reason for study exclusion will be documented and presented in the PRISMA flow  
197 diagram for study screening (Figure 1).

198 Guidelines identified from the guideline repositories will be recorded in an Excel spread sheet.

### 199 **Data Items**

200 Data pertaining to the publication details (authors, year of publication, journal, etc) will be  
201 identified. All relevant recommendations will be extracted from the guidelines to aid in the  
202 determination of population(s) in which the intraoperative transfusion guidelines pertain to (type of  
203 surgery), patient variables taken into consideration in determining appropriateness for transfusion,  
204 and grading of recommendation if assigned will be extracted. We will identify whether or not the  
205 following variables are accounted for in identified decision rules or recommendations: patient  
206 comorbidities-specifically a history of coronary artery disease, hemodynamics (hypotension,  
207 tachycardia, or presence of vasopressor support), estimated blood loss, evidence of cardiac  
208 ischemia, and evidence of end organ ischemia in addition to cardiac. Data extraction forms (DEF)  
209 will be developed and piloted independently by two reviewers on a set of 5 randomly selected  
210 guidelines. Modifications will be made to the DEF as necessary. Data will be extracted  
211 independently by two reviewers, in duplicate.

### 212 **Outcomes & Prioritization**

213 The objectives are to (1) characterize the clinical practice guidelines advising on  
214 intraoperative RBC utilization (2) appraise their quality and (3) provide a descriptive summary of the  
215 included guidelines.

### 216 **Characterization of identified guidelines**

217 A descriptive table of identified guidelines will be presented. This table will include  
218 information publication information as well as the target patient population of the guideline.

**Guideline quality assessment: AGREE II**

The Appraisal of Guidelines for Research and Evaluation II (AGREE II) instrument will be used to assess the quality of included guidelines (54). The AGREE II instrument is a validated questionnaire aimed at assessing the methodologic quality of clinical practice guidelines and has been widely adopted in the scientific literature (54) (55) (56). It is comprised of 23 questions scored on a seven-point Likert scale (whereby 7 indicates the highest quality), covering 6 domains, inclusive of scope and purpose of the guidelines, stakeholder involvement, rigour of development, clarity of presentation and editorial independent. There are two additional questions. The first assesses the overall quality of the guideline, rated on a seven-point Likert scale. The final question asks the evaluator whether they would recommend using this guideline, to which the assessor responds "yes," "yes, with modifications," or "no."

It is recommended that four assessors complete the AGREE II to achieve an intra-class correlation coefficient  $\geq 0.7$ . Four appraisers will therefore be selected to complete the online training and independently evaluate the included guidelines. Once complete, the evaluators will meet and discuss any scores differing by more than 1 point. At that point, evaluators can amend or keep their original score. Inter-rater reliability will be calculated using the intraclass correlation coefficient (ICC) using SAS.

Domain scores will be reported separately using both the median and scaled domain scores, as is recommended by the AGREE II consortium. The scaled domain score will be calculated as follows:  $(\text{obtained score} - \text{minimal possible score}) / (\text{maximal possible score} - \text{minimal possible score}) = \_ \%$ . The minimum possible score is calculated as:  $(\text{number of questions}) \times (\text{number of reviewers}) \times 1$ . The maximum possible score is calculated as:  $(\text{number of questions}) \times (\text{number of reviewers}) \times 7$ .

**Recommendation synthesis**

A descriptive table of included studies will be presented displaying all recommendations pertaining to indications for RBC transfusion in the intraoperative period. Recommendations will be compared for consistency and/or repetition.

*Baker et al. Guidelines on the intraoperative transfusion of red blood cells: a protocol for systematic review*

1  
2  
3 246 **Analysis of subgroups or subsets**

4  
5 247 Guidelines pertaining to indications for blood transfusion in cardiac versus non-cardiac  
6  
7 248 surgery patients will be grouped and considered separately. In addition, guidelines published  
8  
9 249 following publication of the TRICC trial in May 1997 will be considered separately in our descriptive  
10  
11 250 analysis (18). The rationale for this being that the prevailing theme of current practice is a result of  
12  
13 251 this trial.

14  
15 252 **Dissemination**

16  
17  
18 253 The results of this review will be submitted for presentation at national and international  
19  
20 254 meetings and publication in a peer-reviewed journal.

21  
22 255 **Reporting of review**

23  
24 256 The findings of this systematic review will be reported according to the Preferred Reporting  
25  
26 257 Items for Systematic Reviews and Meta-analyses (PRISMA) statement. The completed checklist  
27  
28 258 will be provided as supplementary material.

29  
30 259 **Confidence in cumulative evidence**

31  
32  
33 260 The quality of recommendations will be evaluated by using the systematic and  
34  
35 261 comprehensive approach known as Grading of Recommendations, Assessment, Development and  
36  
37 262 Evaluations (GRADE) (57). The quality of evidence will be assessed across the domains of risk of  
38  
39 263 bias, consistency, directness, precision and publication bias.

40  
41 264 **Patient and public involvement**

42  
43  
44 265 This investigation is aligned with research priorities established by The Canadian Blood  
45  
46 266 Services (CBS), a not-for-profit charitable organization, responsible for managing the Canadian  
47  
48 267 blood supply (with the exception of Quebec) (58). Specifically, they have identified: (1) promoting  
49  
50 268 appropriate blood product utilization and (2) ensuring an adequate blood product supply, as two of  
51  
52 269 five research priorities. CBS invites public participation in their bi-annual board meetings, where a  
53  
54 270 number of issues are addressed, inclusive of priority research agendas. Patients or the public

*Baker et al. Guidelines on the intraoperative transfusion of red blood cells: a protocol for systematic review*

271 were not involved in the development of our specific research question or outcome measures of  
272 interests.

273 **DISCUSSION**

274 A significant number of patients receive intra-operative transfusion. However, there is  
275 substantial variation in transfusion practice and a paucity of guidance available. Despite the fact  
276 that a plea for intraoperative blood transfusion guidelines was made over 20 years ago, widely  
277 adopted recommendations have yet to be developed. (59) A systematic review of transfusion  
278 guidelines in the intraoperative setting has not previously been performed. Although a quality  
279 appraisal of RBC and plasma guidelines was published in 2018, it did not identify intraoperative  
280 recommendations (37). Additionally, their search strategy did not include guideline clearinghouses  
281 or the grey literature.

282 There are several methodologic strengths of our review, these include multidisciplinary  
283 input, a PRESS reviewed search strategy, review of the grey literature and application of the  
284 AGREE II tool to assess the quality of identified guidelines by four independent reviewers.

285 This systematic review will allow for identification, appraisal and summary of literature  
286 devoted to the guidance of intraoperative allogenic RBC transfusion. The Perioperative Anesthesia  
287 Clinical Trials Group (PACT) identified transfusion as 1 of 7 themes that has a significant impact  
288 on mortality, reinforcing the importance of this review (60). The results of this review will provide  
289 rationale and justification for development of guidance, or the need for prospective evaluation of  
290 various intra-operative transfusion strategies. If evidence-informed recommendations for the use  
291 of intra-operative transfusion can be developed and disseminated the incidence of over-transfusion  
292 may be reduced, ensuring responsible use of this limited resource, and minimizing patient  
293 exposure to the risks of transfusion.

294 To achieve this goal will require collaboration between surgeons, anesthetists, and  
295 transfusion specialists. Given the paucity of high quality data on which to base guidelines, this  
296 collaboration must first identifies areas where only expert opinion exists and propose methods for



*Baker et al. Guidelines on the intraoperative transfusion of red blood cells: a protocol for systematic review*

1  
2  
3 297 further examination. The input of patients who have had intra-operative transfusion should be  
4  
5 298 sought to determine where patient preference may supersede rigorous adherence to guidelines.  
6  
7 299 Following well planned knowledge translation phase, auditing to monitor compliance with the  
8  
9 300 guidelines will need to be done. Additionally, following guideline implementation quality assurance  
10  
11 301 initiatives with patient centred outcomes will also be necessary to ensure that the safety and  
12  
13 302 tolerability of developed guidelines. Thus, it is unlikely that final guideline recommendations  
14  
15 303 regarding intra-operative transfusion will be forthcoming in the near future. However, this review  
16  
17 304 reinforces the urgent need to begin the undertaking.  
18  
19  
20 305

21  
22 306 **Acknowledgements:** The authors thank Josee Skuce for her help with developing and PRESS  
23  
24 307 reviewing the search strategy, as well as retrieving articles.  
25

26 308 **Funding:** Canadian Blood Services Blood Efficiency and Accelerator Award Program and The  
27  
28 309 Academic Health Science Center Alternative Funding Plan Innovation Fund.  
29

30 310 **Competing interests:** None to declare.  
31

32 311 **Sponsor:** None to declare.  
33  
34  
35  
36  
37  
38  
39  
40  
41  
42  
43  
44  
45  
46  
47  
48  
49  
50  
51  
52  
53  
54  
55  
56  
57  
58  
59  
60

## 312 **Authors' Contribution**

313 Laura Baker is responsible for aiding in the conception of the work, drafting and revising the  
314 manuscript, approves the submitted version and is accountable for all aspects of the work.

315

316 Lily Park, Richard Gilbert, Andre Martel, Hilalion Ahn, Alexandra Davies, Daniel McIsaac,  
317 Elianna Saidenberg and Alan Tinmouth are responsible for aiding in the conception of the  
318 work, revising the manuscript, approving the final version and are in agreement to being  
319 accountable for all aspects of the work.

320

321 Dean Fergusson and Guillaume Martel are responsible for aiding in the conception of the  
322 work, revising it for important intellectual content, give their approval of the content for  
323 publication and agree to accountability for all aspects of the work. GM is the guarantor of the  
324 protocol.

325

- 326 1. Hendrickson JE, Roubinian NH, Chowdhury D, Brambilla D, Murphy EL, Wu Y, et al. Incidence  
327 of transfusion reactions: a multicenter study utilizing systematic active surveillance and expert  
328 adjudication. *Transfusion*. 2016;56(10):2587-96.
- 329 2. Clinical Guide to Transfusion: Adverse Reactions [Internet]. 2017. Available from:  
330 <https://professionaleducation.blood.ca/en/transfusion/clinical-guide-transfusion>.
- 331 3. Youssef LA, Spitalnik SL. Transfusion-related immunomodulation: a reappraisal. *Curr Opin*  
332 *Hematol*. 2017;24(6):551-7.
- 333 4. Wu HL, Tai YH, Lin SP, Chan MY, Chen HH, Chang KY. The Impact of Blood Transfusion on  
334 Recurrence and Mortality Following Colorectal Cancer Resection: A Propensity Score Analysis of  
335 4,030 Patients. *Sci Rep*. 2018;8(1):13345.
- 336 5. Hallet J, Tsang M, Cheng ES, Habashi R, Kulyk I, Hanna SS, et al. The Impact of Perioperative  
337 Red Blood Cell Transfusions on Long-Term Outcomes after Hepatectomy for Colorectal Liver  
338 Metastases. *Ann Surg Oncol*. 2015;22(12):4038-45.
- 339 6. Xun Y, Tian H, Hu L, Yan P, Yang K, Guo T. The impact of perioperative allogeneic blood  
340 transfusion on prognosis of hepatocellular carcinoma after radical hepatectomy: A systematic review  
341 and meta-analysis of cohort studies. *Medicine (Baltimore)*. 2018;97(43):e12911.
- 342 7. Glance LG, Dick AW, Mukamel DB, Fleming FJ, Zollo RA, Wissler R, et al. Association between  
343 intraoperative blood transfusion and mortality and morbidity in patients undergoing noncardiac  
344 surgery. *Anesthesiology*. 2011;114(2):283-92.
- 345 8. Bernard AC, Davenport DL, Chang PK, Vaughan TB, Zwischenberger JB. Intraoperative  
346 transfusion of 1 U to 2 U packed red blood cells is associated with increased 30-day mortality,  
347 surgical-site infection, pneumonia, and sepsis in general surgery patients. *J Am Coll Surg*.  
348 2009;208(5):931-7, 7 e1-2; discussion 8-9.

*Baker et al. Guidelines on the intraoperative transfusion of red blood cells: a protocol for systematic review*

- 1  
2  
3 349 9. Bennett S, Baker LK, Martel G, Shorr R, Pawlik TM, Tinmouth A, et al. The impact of  
4 350 perioperative red blood cell transfusions in patients undergoing liver resection: a systematic review.  
5 351 HPB (Oxford). 2017;19(4):321-30.
- 6 352 10. Lyu X, Qiao W, Li D, Leng Y. Impact of perioperative blood transfusion on clinical outcomes in  
7 353 patients with colorectal liver metastasis after hepatectomy: a meta-analysis. *Oncotarget*.  
8 354 2017;8(25):41740-8.
- 9 355 11. Shander A, Hofmann A, Gombotz H, Theusinger OM, Spahn DR. Estimating the cost of blood:  
10 356 past, present, and future directions. *Best Pract Res Clin Anaesthesiol*. 2007;21(2):271-89.
- 11 357 12. Stokes EA, Wordsworth S, Staves J, Mundy N, Skelly J, Radford K, et al. Accurate costs of  
12 358 blood transfusion: a microcosting of administering blood products in the United Kingdom National  
13 359 Health Service. *Transfusion*. 2018;58(4):846-53.
- 14 360 13. Amin M, Fergusson D, Wilson K, Tinmouth A, Aziz A, Coyle D, et al. The societal unit cost of  
15 361 allogenic red blood cells and red blood cell transfusion in Canada. *Transfusion*. 2004;44(10):1479-86.
- 16 362 14. Amin M, Fergusson D, Aziz A, Wilson K, Coyle D, Hebert P. The cost of allogeneic red blood  
17 363 cells—a systematic review. *Transfus Med*. 2003;13(5):275-85.
- 18 364 15. Shander A, Hofmann A, Ozawa S, Theusinger OM, Gombotz H, Spahn DR. Activity-based  
19 365 costs of blood transfusions in surgical patients at four hospitals. *Transfusion*. 2010;50(4):753-65.
- 20 366 16. National Blood Inventory 2018 [Available from: <https://blood.ca/en>.  
21 367 17. Hare GM. Tolerance of anemia: understanding the adaptive physiological mechanisms which  
22 368 promote survival. *Transfus Apher Sci*. 2014;50(1):10-2.
- 23 369 18. Hebert PC, Wells G, Tweeddale M, Martin C, Marshall J, Pham B, et al. Does transfusion  
24 370 practice affect mortality in critically ill patients? Transfusion Requirements in Critical Care (TRICC)  
25 371 Investigators and the Canadian Critical Care Trials Group. *Am J Respir Crit Care Med*.  
26 372 1997;155(5):1618-23.
- 27 373 19. Carson JL, Terrin ML, Noveck H, Sanders DW, Chaitman BR, Rhoads GG, et al. Liberal or  
28 374 restrictive transfusion in high-risk patients after hip surgery. *N Engl J Med*. 2011;365(26):2453-62.
- 29 375 20. Mazer CD, Whitlock RP, Fergusson DA, Belley-Cote E, Connolly K, Khanykin B, et al. Six-  
30 376 Month Outcomes after Restrictive or Liberal Transfusion for Cardiac Surgery. *N Engl J Med*.  
31 377 2018;379(13):1224-33.
- 32 378 21. Carson JL, Grossman BJ, Kleinman S, Tinmouth AT, Marques MB, Fung MK, et al. Red blood  
33 379 cell transfusion: a clinical practice guideline from the AABB\*. *Ann Intern Med*. 2012;157(1):49-58.
- 34 380 22. Wu WC, Smith TS, Henderson WG, Eaton CB, Poses RM, Uttley G, et al. Operative blood loss,  
35 381 blood transfusion, and 30-day mortality in older patients after major noncardiac surgery. *Ann Surg*.  
36 382 2010;252(1):11-7.
- 37 383 23. American Society of Anesthesiologists Task Force on Perioperative Blood T, Adjuvant T. Practice  
38 384 guidelines for perioperative blood transfusion and adjuvant therapies: an updated report by  
39 385 the American Society of Anesthesiologists Task Force on Perioperative Blood Transfusion and  
40 386 Adjuvant Therapies. *Anesthesiology*. 2006;105(1):198-208.
- 41 387 24. Adkins AR, Lee D, Woody DJ, White WA, Jr. Accuracy of blood loss estimations among  
42 388 anesthesia providers. *AANA J*. 2014;82(4):300-6.
- 43 389 25. Barash PG. *Clinical Anesthesia Fundamentals*. Philadelphia: Lippincott Williams & Wilkins;  
44 390 2015.
- 45 391 26. Klein HG, Spahn DR, Carson JL. Red blood cell transfusion in clinical practice. *Lancet*.  
46 392 2007;370(9585):415-26.
- 47 393 27. Bennett S, Tinmouth A, Mclsaac DI, English S, Hebert PC, Karanicolas PJ, et al. Ottawa  
48 394 Criteria for Appropriate Transfusions in Hepatectomy: Using the RAND/UCLA Appropriateness  
49 395 Method. *Ann Surg*. 2018;267(4):766-74.
- 50 396 28. Behrends M, DePalma G, Sands L, Leung J. Association between intraoperative blood  
51 397 transfusions and early postoperative delirium in older adults. *J Am Geriatr Soc*. 2013;61(3):365-70.
- 52 398 29. Choy YC, Lim WL, Ng SH. Audit of perioperative blood transfusion. *Med J Malaysia*.  
53 399 2007;62(4):299-302.

- 1  
2  
3 400 30. Spencer J, Thomas SR, Yardy G, Mukundan C, Barrington R. Are we overusing blood  
4 401 transfusing after elective joint replacement?--a simple method to reduce the use of a scarce  
5 402 resource. *Ann R Coll Surg Engl*. 2005;87(1):28-30.
- 6 403 31. Niraj G, Puri GD, Arun D, Chakravarty V, Aveek J, Chari P. Assessment of intraoperative blood  
7 404 transfusion practice during elective non-cardiac surgery in an Indian tertiary care hospital. *Br J*  
8 405 *Anaesth*. 2003;91(4):586-9.
- 9 406 32. Mallett SV, Peachey TD, Sanehi O, Hazlehurst G, Mehta A. Reducing red blood cell  
10 407 transfusion in elective surgical patients: the role of audit and practice guidelines. *Anaesthesia*.  
11 408 2000;55(10):1013-9.
- 12 409 33. Hallissey MT, Crowson MC, Kiff RS, Kingston RD, Fielding JW. Blood transfusion: an overused  
13 410 resource in colorectal cancer surgery. *Ann R Coll Surg Engl*. 1992;74(1):59-62.
- 14 411 34. Bennett S, Ayoub A, Tran A, English S, Tinmouth A, McIsaac DI, et al. Current practices in  
15 412 perioperative blood management for patients undergoing liver resection: a survey of surgeons and  
16 413 anesthesiologists. *Transfusion*. 2018;58(3):781-7.
- 17 414 35. Meier J, Filipescu D, Kozek-Langenecker S, Llau Pitarch J, Mallett S, Martus P, et al.  
18 415 Intraoperative transfusion practices in Europe. *Br J Anaesth*. 2016;116(2):255-61.
- 19 416 36. Carson JL, Guyatt G, Heddle NM, Grossman BJ, Cohn CS, Fung MK, et al. Clinical Practice  
20 417 Guidelines From the AABB: Red Blood Cell Transfusion Thresholds and Storage. *JAMA*.  
21 418 2016;316(19):2025-35.
- 22 419 37. Pavenski K, Stanworth S, Fung M, Wood EM, Pink J, Murphy MF, et al. Quality of Evidence-  
23 420 Based Guidelines for Transfusion of Red Blood Cells and Plasma: A Systematic Review. *Transfus Med*  
24 421 *Rev*. 2018.
- 25 422 38. Kozek-Langenecker SA, Afshari A, Albaladejo P, Santullano CA, De Robertis E, Filipescu DC, et  
26 423 al. Management of severe perioperative bleeding: guidelines from the European Society of  
27 424 Anaesthesiology. *Eur J Anaesthesiol*. 2013;30(6):270-382.
- 28 425 39. Practice Guidelines for blood component therapy: A report by the American Society of  
29 426 Anesthesiologists Task Force on Blood Component Therapy. *Anesthesiology*. 1996;84(3):732-47.
- 30 427 40. Klein AA, Arnold P, Bingham RM, Brohi K, Clark R, Collis R, et al. AAGBI guidelines: the use of  
31 428 blood components and their alternatives 2016. *Anaesthesia*. 2016;71(7):829-42.
- 32 429 41. Moll FL, Powell JT, Fraedrich G, Verzini F, Haulon S, Waltham M, et al. Management of  
33 430 abdominal aortic aneurysms clinical practice guidelines of the European society for vascular surgery.  
34 431 *Eur J Vasc Endovasc Surg*. 2011;41 Suppl 1:S1-S58.
- 35 432 42. Liberati A, Altman DG, Tetzlaff J, Mulrow C, Gotzsche PC, Ioannidis JP, et al. The PRISMA  
36 433 statement for reporting systematic reviews and meta-analyses of studies that evaluate health care  
37 434 interventions: explanation and elaboration. *PLoS Med*. 2009;6(7):e1000100.
- 38 435 43. Moher D, Shamseer L, Clarke M, Ghersi D, Liberati A, Petticrew M, et al. Preferred reporting  
39 436 items for systematic review and meta-analysis protocols (PRISMA-P) 2015 statement. *Syst Rev*.  
40 437 2015;4:1.
- 41 438 44. Clinical Practice Guidelines we can trust [press release]. The National Academies Press 2011.
- 42 439 45. Rozanski A, Slomka P, D SB. Extending the Use of Coronary Calcium Scanning to Clinical  
43 440 Rather Than Just Screening Populations: Ready for Prime Time? *Circ Cardiovasc Imaging*. 2016;9(5).
- 44 441 46. Guidelines International Network [Available from: [www.g-i-n.net](http://www.g-i-n.net)].
- 45 442 47. National Institute for Health for Health and Care Excellence (NICE).
- 46 443 48. National Health Service (NHS) Evidence.
- 47 444 49. Canadian Medical Association Infobase.
- 48 445 50. New Zealand Guidelines Group.
- 49 446 51. World Health Organization.
- 50 447 52. Ulrich-Vinther M, Carmody EE, Goater JJ, K Sb, O'Keefe RJ, Schwarz EM. Recombinant adeno-  
51 448 associated virus-mediated osteoprotegerin gene therapy inhibits wear debris-induced osteolysis. *J*  
52 449 *Bone Joint Surg Am*. 2002;84-A(8):1405-12.

*Baker et al. Guidelines on the intraoperative transfusion of red blood cells: a protocol for systematic review*

- 1  
2  
3 450 53. Balk EM, Chung M, Chen ML, Trikalinos TA, Kong Win Chang L. Assessing the Accuracy of  
4 451 Google Translate to Allow Data Extraction From Trials Published in Non-English Languages. AHRQ  
5 452 Methods for Effective Health Care. Rockville (MD)2013.  
6 453 54. Brouwers MC, Kho ME, Browman GP, Burgers JS, Cluzeau F, Feder G, et al. AGREE II:  
7 454 advancing guideline development, reporting, and evaluation in health care. *Prev Med*.  
8 455 2010;51(5):421-4.  
9 456 55. Brouwers MC, Kho ME, Browman GP, Burgers JS, Cluzeau F, Feder G, et al. Development of  
10 457 the AGREE II, part 1: performance, usefulness and areas for improvement. *CMAJ*.  
11 458 2010;182(10):1045-52.  
12 459 56. Brouwers MC, Kho ME, Browman GP, Burgers JS, Cluzeau F, Feder G, et al. Development of  
13 460 the AGREE II, part 2: assessment of validity of items and tools to support application. *CMAJ*.  
14 461 2010;182(10):E472-8.  
15 462 57. Guyatt GH, Oxman AD, Vist GE, Kunz R, Falck-Ytter Y, Alonso-Coello P, et al. GRADE: an  
16 463 emerging consensus on rating quality of evidence and strength of recommendations. *BMJ*.  
17 464 2008;336(7650):924-6.  
18 465 58. Canadian Blood Services Centre for Innovation Intramural Research Grant Program  
19 466 Guidelines 2018 [Available from:  
20 467 [https://blood.ca/sites/default/files/Intramural\\_Research\\_Grant\\_Program\\_Guidelines\\_1.pdf](https://blood.ca/sites/default/files/Intramural_Research_Grant_Program_Guidelines_1.pdf).  
21 468 59. Sudhindran S. Perioperative blood transfusion: a plea for guidelines. *Ann R Coll Surg Engl*.  
22 469 1997;79(4):299-302.  
23 470 60. Boet S, Etherington N, Nicola D, Beck A, Bragg S, Carrigan ID, et al. Anesthesia interventions  
24 471 that alter perioperative mortality: a scoping review. *Syst Rev*. 2018;7(1):218.  
25 472

26  
27  
28  
29  
30 473 Figure 1: Flow diagram of study selection process.  
31  
32  
33  
34  
35  
36  
37  
38  
39  
40  
41  
42  
43  
44  
45  
46  
47  
48  
49  
50  
51  
52  
53  
54  
55  
56  
57  
58  
59  
60

1  
2  
3  
4  
5  
6  
7  
8  
9  
10  
11  
12  
13  
14  
15  
16  
17  
18  
19  
20  
21  
22  
23  
24  
25  
26  
27  
28  
29  
30  
31  
32  
33  
34  
35  
36  
37  
38  
39  
40  
41  
42  
43  
44  
45  
46  
47  
48  
49  
50  
51  
52  
53  
54  
55  
56  
57  
58  
59  
60

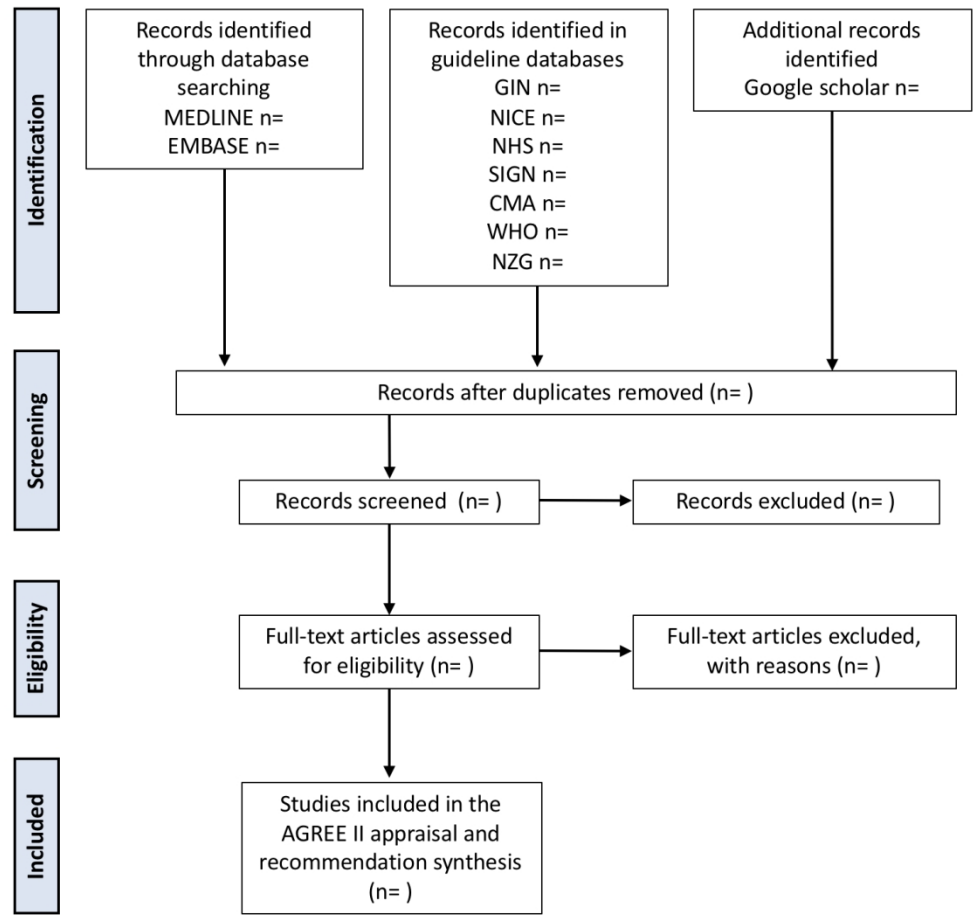

Figure 1: Flow diagram of study selection process.

## Appendix I: Search Strategy

Database: Ovid MEDLINE(R) ALL <1946 to January 21, 2019>

Search Strategy:

-----

1 \*blood transfusion/ or blood component transfusion/ or erythrocyte transfusion/ (36153)  
 2 ((red blood cell\$ or rbc or erythrocyte\$ or red cell\$) adj3 (transfus\$ or infus\* or retransfus\*)).tw. (10506)  
 3 (blood adj4 transfus\*).tw. (54555) - I expanded this  
 4 RBCT.tw,kw. (95)  
 5 (RBC transfusion or red blood cell transfusion).kw. (110)  
 6 (hemotransfus\$ or haemotransfus\$).tw,kw. (234)  
 7 or/1-6 (78107)  
 8 INTRAOPERATIVE COMPLICATIONS/ or INTRAOPERATIVE CARE/ or INTRAOPERATIVE PERIOD/  
 9 or Perioperative Care/ (69769)  
 10 (intraoperat\* or intra-operat\* or perioperat\* or peri-operat\*).tw,kw. (205937)  
 11 (surg\* or operat\*).ti. (708792) - added this line  
 12 (transfus\* adj5 (operat\* or surg\*)).tw. (8642)  
 13 ((undergoing or during) adj4 (surg\* or operat\*)).tw. (180983) - expanded this line by taking out  
 14 'transfus\*  
 15 or/8-12 (968870)  
 16 7 and 13 (18339)  
 17 exp clinical pathway/ (6046)  
 18 clinical protocol/ (25911)  
 19 exp consensus/ (9313)  
 20 exp consensus development conference/ (11078)  
 21 exp consensus development conferences as topic/ (2618)  
 22 guidelines as topic/ (37008)  
 23 exp practice guideline/ (24266)  
 24 practice guidelines as topic/ (105996)  
 25 health planning guidelines/ (4007)  
 26 (guideline or practice guideline or consensus development conference or consensus development  
 27 conference, NIH).pt. (39641)  
 28 (standards or guideline or guidelines).ti,kf,kw. (96689)  
 29 ((practice or treatment\* or clinical) adj guideline\*).ab. (33765)  
 30 (CPG or CPGs).ti. (5320)  
 31 consensus\*.ti,kf,kw. (22038)  
 32 ((critical or clinical or practice) adj2 (path or paths or pathway or pathways or protocol\*)).ti,ab,kf,kw.  
 33 (17432)  
 34 recommendat\*.ti,kf,kw. (35650)  
 35 or/15-30 (334141)  
 36 14 and 31 (550)  
 37 (rbc transfusion\* or red blood cell\* transfusion\*).ti. (1054)  
 38 (transfus\* and (intraoperat\* or intra-operat\* or perioperat\* or peri-operat\*)).ti. (1014)  
 39 33 or 34 (1999)  
 40 (guideline or practice guideline or consensus development conference or consensus development  
 41 conference, NIH).pt. (39641)  
 42 (standards or guideline or guidelines).ti,kf,kw. (96689)  
 43 36 or 37 (122196)  
 44 35 and 38 (61)  
 45 32 or 39 (578)  
 46 animals/ not humans/ (4465996)  
 47 40 not 41 (577)  
 48 (exp infants/ or child/) not adult/ (1517431)  
 49 42 not 43 (546)

## PRISMA-P 2015 Checklist

This checklist has been adapted for use with protocol submissions to *Systematic Reviews* from Table 3 in Moher D et al: Preferred reporting items for systematic review and meta-analysis protocols (PRISMA-P) 2015 statement. *Systematic Reviews* 2015 4:1

| Section/topic                     | #  | Checklist item                                                                                                                                                                                  | Information reported     |                          | Line number(s) |
|-----------------------------------|----|-------------------------------------------------------------------------------------------------------------------------------------------------------------------------------------------------|--------------------------|--------------------------|----------------|
|                                   |    |                                                                                                                                                                                                 | Yes                      | No                       |                |
| <b>ADMINISTRATIVE INFORMATION</b> |    |                                                                                                                                                                                                 |                          |                          |                |
| <b>Title</b>                      |    |                                                                                                                                                                                                 |                          |                          |                |
| Identification                    | 1a | Identify the report as a protocol of a systematic review                                                                                                                                        | x                        | <input type="checkbox"/> | 1-2            |
| Update                            | 1b | If the protocol is for an update of a previous systematic review, identify as such                                                                                                              | <input type="checkbox"/> | x                        | N/A            |
| <b>Registration</b>               | 2  | If registered, provide the name of the registry (e.g., PROSPERO) and registration number in the Abstract                                                                                        | x                        | <input type="checkbox"/> | 49             |
| <b>Authors</b>                    |    |                                                                                                                                                                                                 |                          |                          |                |
| Contact                           | 3a | Provide name, institutional affiliation, and e-mail address of all protocol authors; provide physical mailing address of corresponding author                                                   | x                        | <input type="checkbox"/> | 4-33           |
| Contributions                     | 3b | Describe contributions of protocol authors and identify the guarantor of the review                                                                                                             | x                        | <input type="checkbox"/> | 312-323        |
| <b>Amendments</b>                 | 4  | If the protocol represents an amendment of a previously completed or published protocol, identify as such and list changes; otherwise, state plan for documenting important protocol amendments | x                        | <input type="checkbox"/> | 155-156        |
| <b>Support</b>                    |    |                                                                                                                                                                                                 |                          |                          |                |
| Sources                           | 5a | Indicate sources of financial or other support for the review                                                                                                                                   | x                        | <input type="checkbox"/> | 308-309        |
| Sponsor                           | 5b | Provide name for the review funder and/or sponsor                                                                                                                                               | x                        | <input type="checkbox"/> | 311            |
| Role of sponsor/funder            | 5c | Describe roles of funder(s), sponsor(s), and/or institution(s), if any, in developing the protocol                                                                                              | <input type="checkbox"/> | x                        | N/A            |
| <b>INTRODUCTION</b>               |    |                                                                                                                                                                                                 |                          |                          |                |
| <b>Rationale</b>                  | 6  | Describe the rationale for the review in the context of what is already known                                                                                                                   | x                        | <input type="checkbox"/> | 61-141         |
| <b>Objectives</b>                 | 7  | Provide an explicit statement of the question(s) the review will address with reference to participants, interventions, comparators, and outcomes (PICO)                                        | x                        | <input type="checkbox"/> | 143-147        |



| Section/topic                             | #   | Checklist item                                                                                                                                                                                                                              | Information reported     |                          | Line number(s) |
|-------------------------------------------|-----|---------------------------------------------------------------------------------------------------------------------------------------------------------------------------------------------------------------------------------------------|--------------------------|--------------------------|----------------|
|                                           |     |                                                                                                                                                                                                                                             | Yes                      | No                       |                |
| <b>METHODS</b>                            |     |                                                                                                                                                                                                                                             |                          |                          |                |
| <b>Eligibility criteria</b>               | 8   | Specify the study characteristics (e.g., PICO, study design, setting, time frame) and report characteristics (e.g., years considered, language, publication status) to be used as criteria for eligibility for the review                   | x                        | <input type="checkbox"/> | 157-172        |
| <b>Information sources</b>                | 9   | Describe all intended information sources (e.g., electronic databases, contact with study authors, trial registers, or other grey literature sources) with planned dates of coverage                                                        | x                        | <input type="checkbox"/> | 173-187        |
| <b>Search strategy</b>                    | 10  | Present draft of search strategy to be used for at least one electronic database, including planned limits, such that it could be repeated                                                                                                  | x                        | <input type="checkbox"/> | Appendix 1     |
| <b>STUDY RECORDS</b>                      |     |                                                                                                                                                                                                                                             |                          |                          |                |
| Data management                           | 11a | Describe the mechanism(s) that will be used to manage records and data throughout the review                                                                                                                                                | x                        | <input type="checkbox"/> | 189-190        |
| Selection process                         | 11b | State the process that will be used for selecting studies (e.g., two independent reviewers) through each phase of the review (i.e., screening, eligibility, and inclusion in meta-analysis)                                                 | x                        | <input type="checkbox"/> | 190-193        |
| Data collection process                   | 11c | Describe planned method of extracting data from reports (e.g., piloting forms, done independently, in duplicate), any processes for obtaining and confirming data from investigators                                                        | x                        | <input type="checkbox"/> | 199-211        |
| <b>Data items</b>                         | 12  | List and define all variables for which data will be sought (e.g., PICO items, funding sources), any pre-planned data assumptions and simplifications                                                                                       | x                        | <input type="checkbox"/> | 199-211        |
| <b>Outcomes and prioritization</b>        | 13  | List and define all outcomes for which data will be sought, including prioritization of main and additional outcomes, with rationale                                                                                                        | x                        | <input type="checkbox"/> | 212-215        |
| <b>Risk of bias in individual studies</b> | 14  | Describe anticipated methods for assessing risk of bias of individual studies, including whether this will be done at the outcome or study level, or both; state how this information will be used in data synthesis                        | x                        | <input type="checkbox"/> | 219-241        |
| <b>DATA</b>                               |     |                                                                                                                                                                                                                                             |                          |                          |                |
| <b>Synthesis</b>                          | 15a | Describe criteria under which study data will be quantitatively synthesized                                                                                                                                                                 | x                        | <input type="checkbox"/> | 219            |
|                                           | 15b | If data are appropriate for quantitative synthesis, describe planned summary measures, methods of handling data, and methods of combining data from studies, including any planned exploration of consistency (e.g., $I^2$ , Kendall's tau) | <input type="checkbox"/> | x                        | N/A            |
|                                           | 15c | Describe any proposed additional analyses (e.g., sensitivity or subgroup analyses, meta-regression)                                                                                                                                         | x                        | <input type="checkbox"/> | 246-251        |
|                                           | 15d | If quantitative synthesis is not appropriate, describe the type of summary planned                                                                                                                                                          | x                        | <input type="checkbox"/> | 242-245        |

1  
2  
3  
4  
5  
6  
7  
8  
9  
10  
11  
12  
13  
14  
15  
16  
17  
18  
19  
20  
21  
22  
23  
24  
25  
26  
27  
28  
29  
30  
31  
32  
33  
34  
35  
36  
37  
38  
39  
40  
41  
42  
43  
44  
45  
46

| Section/topic                     | #  | Checklist item                                                                                                              | Information reported     |    | Line number(s) |
|-----------------------------------|----|-----------------------------------------------------------------------------------------------------------------------------|--------------------------|----|----------------|
|                                   |    |                                                                                                                             | Yes                      | No |                |
| Meta-bias(es)                     | 16 | Specify any planned assessment of meta-bias(es) (e.g., publication bias across studies, selective reporting within studies) | <input type="checkbox"/> | x  | N/A            |
| Confidence in cumulative evidence | 17 | Describe how the strength of the body of evidence will be assessed (e.g., GRADE)                                            | <input type="checkbox"/> | x  | N/A            |

For peer review only
