# Supplementary material for: Guidelines on the intraoperative transfusion of red blood cells: a protocol for systematic review
Source: PubMed Central journal article supplement — BMJ Open. 2019 Jun 17;9(6):e029684. doi: 10.1136/bmjopen-2019-029684 (PMC6586075; doi:10.1136/bmjopen-2019-029684), 2019-06-17
Supplement: bmjopen-2019-029684supp002.pdf [file bmjopen-2019-029684supp002.pdf]

## Appendix I: Search Strategy

Database: Ovid MEDLINE(R) ALL <1946 to January 21, 2019>

Search Strategy:

- 
- 1 \*blood transfusion/ or blood component transfusion/ or erythrocyte transfusion/ (36153)
  - 2 ((red blood cell\$ or rbc or erythrocyte\$ or red cell\$) adj3 (transfus\$ or infus\* or retransfus\*)).tw. (10506)
  - 3 (blood adj4 transfus\*).tw. (54555) - I expanded this
  - 4 RBCT.tw,kw. (95)
  - 5 (RBC transfusion or red blood cell transfusion).kw. (110)
  - 6 (hemotransfus\$ or haemotransfus\$).tw,kw. (234)
  - 7 or/1-6 (78107)
  - 8 INTRAOPERATIVE COMPLICATIONS/ or INTRAOPERATIVE CARE/ or INTRAOPERATIVE PERIOD/  
or Perioperative Care/ (69769)
  - 9 (intraoperat\* or intra-operat\* or perioperat\* or peri-operat\*).tw,kw. (205937)
  - 10 (surg\* or operat\*).ti. (708792) - added this line
  - 11 (transfus\* adj5 (operat\* or surg\*)).tw. (8642)
  - 12 ((undergoing or during) adj4 (surg\* or operat\*)).tw. (180983) - expanded this line by taking out  
'transfus\*'
  - 13 or/8-12 (968870)
  - 14 7 and 13 (18339)
  - 15 exp clinical pathway/ (6046)
  - 16 clinical protocol/ (25911)
  - 17 exp consensus/ (9313)
  - 18 exp consensus development conference/ (11078)
  - 19 exp consensus development conferences as topic/ (2618)
  - 20 guidelines as topic/ (37008)
  - 21 exp practice guideline/ (24266)
  - 22 practice guidelines as topic/ (105996)
  - 23 health planning guidelines/ (4007)
  - 24 (guideline or practice guideline or consensus development conference or consensus development  
conference, NIH).pt. (39641)
  - 25 (standards or guideline or guidelines).ti,kf,kw. (96689)
  - 26 ((practice or treatment\* or clinical) adj guideline\*).ab. (33765)
  - 27 (CPG or CPGs).ti. (5320)
  - 28 consensus\*.ti,kf,kw. (22038)
  - 29 ((critical or clinical or practice) adj2 (path or paths or pathway or pathways or protocol\*)).ti,ab,kf,kw.  
(17432)
  - 30 recommendat\*.ti,kf,kw. (35650)
  - 31 or/15-30 (334141)
  - 32 14 and 31 (550)
  - 33 (rbc transfusion\* or red blood cell\* transfusion\*).ti. (1054)
  - 34 (transfus\* and (intraoperat\* or intra-operat\* or perioperat\* or peri-operat\*)).ti. (1014)
  - 35 33 or 34 (1999)
  - 36 (guideline or practice guideline or consensus development conference or consensus development  
conference, NIH).pt. (39641)
  - 37 (standards or guideline or guidelines).ti,kf,kw. (96689)
  - 38 36 or 37 (122196)
  - 39 35 and 38 (61)
  - 40 32 or 39 (578)
  - 41 animals/ not humans/ (4465996)
  - 42 40 not 41 (577)
  - 43 (exp infants/ or child/) not adult/ (1517431)
  - 44 42 not 43 (546)
